# Supplementary material
Source: publisher site journal article supplement (https://www.spandidos-publications.com/34/downloadSupplementary)
Supplement: Supplementary file 1 [file downloadSupplementary]

Table SI. Demographic and clinical characteristics of the study population.

| Characteristics | Ischemic stroke | Control  | P-value             |
|-----------------|-----------------|----------|---------------------|
| Female          | 40%             | 41%      | 0.980               |
| Age             | 70.5±12         | 70.00±11 | 0.990               |
| Hypertension    | 77.40%          | 81.00%   | 0.070               |
| Heart failure   | 16.60%          | 41.60%   | <0.001 <sup>a</sup> |
| CAD             | 29.40%          | 53.80%   | <0.001 <sup>a</sup> |
| MI              | 16.00%          | 34.60%   | <0.001 <sup>a</sup> |
| Diabetes        | 19.60%          | 56.60%   | <0.001 <sup>a</sup> |
| Smokers         | 38.4%           | 37%      | 0.690               |

<sup>a</sup>Statistically significant differences by  $\chi^2$  test or t-test (for age differences). CAD, coronary artery disease; MI, myocardial infarction.

Table SII. Complete list of all unique non-coding variants (irrespective of minor allele frequency) observed in all 54 sequenced genes in the study cohort (controls and patients with stroke).

| Gene    | Chr   | Position  | dbSNP       | Ref | Alt | Func.refgene      |
|---------|-------|-----------|-------------|-----|-----|-------------------|
| ADAMTS2 | chr5  | 178540880 |             | G   | T   | Exonic-synonymous |
| ADAMTS2 | chr5  | 178552091 |             | G   | A   | Exonic-synonymous |
| ADAMTS2 | chr5  | 178552185 | rs112155474 | C   | T   | Intronic          |
| ADAMTS2 | chr5  | 178552899 | rs78566312  | C   | T   | Intronic          |
| ADAMTS2 | chr5  | 178553185 | rs2303643   | G   | A   | Intronic          |
| ADAMTS2 | chr5  | 178555196 | rs1427845   | T   | C   | Intronic          |
| ADAMTS2 | chr5  | 178557107 | rs140401199 | T   | C   | Intronic          |
| ADAMTS2 | chr5  | 178559215 |             | C   | A   | Intronic          |
| ADAMTS2 | chr5  | 178559878 |             | G   | T   | Exonic-synonymous |
| ADAMTS2 | chr5  | 178559990 |             | C   | T   | Intronic          |
| ADAMTS2 | chr5  | 178562834 | rs3822595   | C   | T   | Intronic          |
| ADAMTS2 | chr5  | 178562876 | rs370637996 | C   | T   | Intronic          |
| ADAMTS2 | chr5  | 178563003 |             | G   | T   | Exonic-synonymous |
| ADAMTS2 | chr5  | 178563125 | rs1549603   | A   | T   | Intronic          |
| ADAMTS2 | chr5  | 178564971 | rs9286045   | C   | T   | Intronic          |
| ADAMTS2 | chr5  | 178565001 | rs2303639   | C   | T   | Intronic          |
| ADAMTS2 | chr5  | 178567082 | rs34369919  | C   | T   | Intronic          |
| ADAMTS2 | chr5  | 178579119 | rs2303637   | C   | G   | Intronic          |
| ADAMTS2 | chr5  | 178579134 | rs115550684 | C   | T   | Intronic          |
| ADAMTS2 | chr5  | 178580549 | rs61757478  | G   | A   | Exonic-synonymous |
| ADAMTS2 | chr5  | 178580639 | rs373540125 | C   | T   | Intronic          |
| ADAMTS2 | chr5  | 178580646 | rs115740207 | G   | A   | Intronic          |
| ADAMTS2 | chr5  | 178581124 | rs41285549  | C   | T   | Exonic-synonymous |
| ADAMTS2 | chr5  | 178581797 | rs2278222   | C   | T   | Intronic          |
| ADAMTS2 | chr5  | 178585692 | rs147861022 | C   | T   | Intronic          |
| ADAMTS2 | chr5  | 178608112 | rs35462609  | G   | A   | Exonic-synonymous |
| ADAMTS2 | chr5  | 178608199 |             | G   | T   | Intronic          |
| ADAMTS2 | chr5  | 178608204 | rs78222573  | G   | A   | Intronic          |
| ADAMTS2 | chr5  | 178634743 |             | C   | T   | Intronic          |
| ADAMTS2 | chr5  | 178770759 | rs2271213   | C   | G   | Intronic          |
| AKT2    | chr19 | 40739721  | rs2304186   | G   | T   | UTR3              |
| AKT2    | chr19 | 40739765  | rs201359719 | C   | T   | UTR3              |
| AKT2    | chr19 | 40739770  | rs79275829  | G   | A   | UTR3              |
| AKT2    | chr19 | 40740932  | rs375549081 | C   | T   | Intronic          |
| AKT2    | chr19 | 40742161  | rs56165898  | C   | T   | Intronic          |
| AKT2    | chr19 | 40743858  | rs200438281 | G   | A   | Intronic          |
| AKT2    | chr19 | 40744900  |             | G   | T   | Intronic          |
| AKT2    | chr19 | 40745778  | rs56245956  | G   | A   | Intronic          |
| AKT2    | chr19 | 40745809  |             | G   | T   | Intronic          |
| AKT2    | chr19 | 40745923  | rs12980468  | C   | T   | Intronic          |
| AKT2    | chr19 | 40747798  | rs41306976  | C   | T   | Intronic          |
| AKT2    | chr19 | 40748639  | rs41311971  | C   | T   | Intronic          |
| AKT2    | chr19 | 40748648  | rs35948893  | C   | T   | Intronic          |
| AKT2    | chr19 | 40761026  | rs181993899 | C   | A   | Intronic          |
| AKT2    | chr19 | 40761091  |             | G   | T   | Exonic-synonymous |
| AKT2    | chr19 | 40762915  | rs35588791  | G   | A   | Exonic-synonymous |
| AKT2    | chr19 | 40763067  |             | C   | T   | Intronic          |
| AKT2    | chr19 | 40771108  | rs56303894  | C   | T   | Intronic          |
| AKT2    | chr19 | 40771205  |             | C   | A   | UTR5              |
| ANKS1B  | chr12 | 99166735  |             | T   | C   | Intronic          |
| ANKS1B  | chr12 | 99166805  | rs2287574   | G   | T   | Intronic          |
| ANKS1B  | chr12 | 99175752  | rs79831132  | G   | A   | Intronic          |
| ANKS1B  | chr12 | 99175789  | rs567349853 | T   | C   | Intronic          |
| ANKS1B  | chr12 | 99175870  | rs17028679  | G   | C   | Intronic          |

Table SII. Continued.

| Gene    | Chr   | Position  | dbSNP       | Ref | Alt | Func.refgene      |
|---------|-------|-----------|-------------|-----|-----|-------------------|
| ANKS1B  | chr12 | 99189415  | rs112804197 | A   | G   | Intronic          |
| ANKS1B  | chr12 | 99288355  | rs185471235 | C   | G   | Intronic          |
| ANKS1B  | chr12 | 99288496  | rs112380553 | C   | T   | UTR5              |
| ANKS1B  | chr12 | 99446977  | rs80197475  | C   | T   | Exonic-synonymous |
| ANKS1B  | chr12 | 99837420  |             | G   | C   | Intronic          |
| ANKS1B  | chr12 | 100049083 | rs11109978  | C   | T   | Intronic          |
| ANKS1B  | chr12 | 100166602 | rs149365029 | C   | T   | Intronic          |
| ANKS1B  | chr12 | 100166796 | rs370857411 | C   | T   | Exonic-synonymous |
| ANKS1B  | chr12 | 100175761 | rs73145431  | T   | C   | Intronic          |
| ANKS1B  | chr12 | 100175876 |             | C   | A   | splicing          |
| ANKS1B  | chr12 | 100200263 |             | C   | A   | Exonic-synonymous |
| ANKS1B  | chr12 | 100378068 |             | C   | A   | UTR5              |
| ATP6V1F | chr7  | 128502920 | rs11547837  | C   | T   | UTR5              |
| ATP6V1F | chr7  | 128503102 | rs144361793 | C   | A   | Exonic-synonymous |
| COMMD7  | chr20 | 31315821  | rs200305991 | G   | T   | Intronic          |
| COMMD7  | chr20 | 31315867  | rs2064937   | C   | T   | Intronic          |
| CTCFL   | chr20 | 56078499  | rs138934649 | G   | A   | Exonic-synonymous |
| CTCFL   | chr20 | 56083873  | rs41304417  | G   | A   | Intronic          |
| CTCFL   | chr20 | 56087642  |             | C   | T   | Intronic          |
| CTCFL   | chr20 | 56088958  | rs6513310   | C   | T   | Intronic          |
| CTCFL   | chr20 | 56089590  | rs147926178 | C   | T   | Intronic          |
| CTCFL   | chr20 | 56090914  |             | C   | A   | Intronic          |
| CTCFL   | chr20 | 56094297  |             | G   | T   | Exonic-synonymous |
| CTCFL   | chr20 | 56098400  | rs66593447  | T   | G   | Intronic          |
| CTCFL   | chr20 | 56099305  | rs11699220  | G   | A   | UTR5              |
| CUBN    | chr10 | 16873396  | rs141937843 | G   | A   | Exonic-synonymous |
| CUBN    | chr10 | 16876992  | rs370911251 | C   | T   | Intronic          |
| CUBN    | chr10 | 16878204  | rs703062    | T   | C   | Intronic          |
| CUBN    | chr10 | 16878295  | rs139596037 | G   | T   | Exonic-synonymous |
| CUBN    | chr10 | 16883020  |             | C   | A   | Exonic-synonymous |
| CUBN    | chr10 | 16883044  | rs372599172 | T   | C   | Exonic-synonymous |
| CUBN    | chr10 | 16911567  | rs703074    | C   | T   | Intronic          |
| CUBN    | chr10 | 16911605  | rs703075    | C   | A   | Intronic          |
| CUBN    | chr10 | 16916308  | rs181055353 | C   | T   | Intronic          |
| CUBN    | chr10 | 16916364  |             | C   | A   | Intronic          |
| CUBN    | chr10 | 16918972  | rs1801241   | A   | G   | Exonic-synonymous |
| CUBN    | chr10 | 16930608  | rs375597321 | G   | A   | Intronic          |
| CUBN    | chr10 | 16932470  | rs369599232 | G   | A   | Exonic-synonymous |
| CUBN    | chr10 | 16942694  |             | G   | T   | Exonic-synonymous |
| CUBN    | chr10 | 16948177  | rs780807    | A   | G   | Intronic          |
| CUBN    | chr10 | 16949550  | rs3740165   | T   | C   | Exonic-synonymous |
| CUBN    | chr10 | 16955834  | rs201001705 | C   | T   | Exonic-synonymous |
| CUBN    | chr10 | 16957083  | rs201002903 | G   | A   | Exonic-synonymous |
| CUBN    | chr10 | 16967325  | rs11254278  | C   | T   | Exonic-synonymous |
| CUBN    | chr10 | 16979566  | rs2356589   | G   | T   | Intronic          |
| CUBN    | chr10 | 16980925  | rs3817218   | C   | T   | Intronic          |
| CUBN    | chr10 | 16981106  |             | G   | T   | Exonic-synonymous |
| CUBN    | chr10 | 16989272  | rs61841454  | G   | A   | Exonic-synonymous |
| CUBN    | chr10 | 16989486  | rs2271467   | T   | A   | Intronic          |
| CUBN    | chr10 | 16991876  | rs28473579  | G   | C   | Intronic          |
| CUBN    | chr10 | 16991940  |             | C   | T   | Intronic          |
| CUBN    | chr10 | 16992010  |             | C   | A   | Exonic-synonymous |
| CUBN    | chr10 | 16996611  |             | G   | T   | Intronic          |
| CUBN    | chr10 | 17007959  |             | G   | T   | Intronic          |
| CUBN    | chr10 | 17008027  |             | G   | T   | Intronic          |

Table SII. Continued.

| Gene   | Chr   | Position  | dbSNP       | Ref | Alt | Func.refgene         |
|--------|-------|-----------|-------------|-----|-----|----------------------|
| CUBN   | chr10 | 17024441  | rs41289309  | G   | A   | Intronic             |
| CUBN   | chr10 | 17061980  | .           | G   | T   | Exonic-synonymous    |
| CUBN   | chr10 | 17085795  | rs139744584 | A   | T   | Intronic             |
| CUBN   | chr10 | 17087156  | rs1873469   | G   | A   | Exonic-synonymous    |
| CUBN   | chr10 | 17087211  | rs181387097 | A   | G   | Intronic             |
| CUBN   | chr10 | 17088006  | rs1801228   | T   | C   | Exonic-synonymous    |
| CUBN   | chr10 | 17110110  | rs148712017 | G   | A   | Exonic-synonymous    |
| CUBN   | chr10 | 17110598  | rs78549445  | T   | G   | Intronic             |
| CUBN   | chr10 | 17110722  | .           | G   | A   | Exonic-synonymous    |
| CUBN   | chr10 | 17113827  | .           | G   | T   | Exonic-synonymous    |
| CUBN   | chr10 | 17130199  | rs41289311  | G   | A   | Exonic-synonymous    |
| CUBN   | chr10 | 17146590  | rs12571671  | A   | G   | Exonic-synonymous    |
| CUBN   | chr10 | 17147403  | rs41302970  | C   | T   | Intronic             |
| CUBN   | chr10 | 17147624  |             | C   | A   | Intronic             |
| CUBN   | chr10 | 17151785  |             | G   | T   | Intronic             |
| CUBN   | chr10 | 17157402  | rs45498199  | G   | A   | Intronic             |
| CUBN   | chr10 | 17164569  | rs11254381  | G   | A   | Intronic             |
| CUBN   | chr10 | 17164625  | rs7070148   | A   | C   | Intronic             |
| CUBN   | chr10 | 17165552  | rs2273737   | T   | G   | Intronic             |
| CUBN   | chr10 | 17165703  |             | G   | T   | Intronic             |
| CUBN   | chr10 | 17169811  | rs200466568 | G   | A   | Intronic             |
| FBXL7  | chr5  | 15500852  |             | G   | T   | Intronic             |
| FBXL7  | chr5  | 15500889  | rs512861    | A   | G   | Intronic             |
| FBXL7  | chr5  | 15616105  |             | G   | T   | Exonic-synonymous    |
| FBXL7  | chr5  | 15927927  | rs66504704  | A   | G   | Intronic             |
| FBXL7  | chr5  | 15928459  | rs191291497 | C   | T   | Exonic-synonymous    |
| FBXL7  | chr5  | 15936989  |             | G   | T   | Exonic-synonymous    |
| FBXL7  | chr5  | 15936995  | rs142704418 | C   | T   | Exonic-synonymous    |
| FBXL7  | chr5  | 15937010  | rs61748187  | C   | T   | Exonic-synonymous    |
| FCER1G | chr1  | 161188158 | rs112079466 | C   | A   | Intronic             |
| FCER1G | chr1  | 161188572 |             | G   | C   | Intronic             |
| FCER1G | chr1  | 161188587 | rs11590967  | G   | A   | Intronic             |
| FCER1G | chr1  | 161188649 | rs41270849  | G   | A   | Intronic             |
| FCER1G | chr1  | 161185062 |             | G   | A   | Upstream; downstream |
| GLIS3  | chr9  | 3879388   | rs368380872 | C   | T   | Intronic             |
| GLIS3  | chr9  | 3879441   | rs202217571 | G   | A   | Exonic-synonymous    |
| GLIS3  | chr9  | 3879646   | rs17692969  | G   | A   | Intronic             |
| GLIS3  | chr9  | 3932283   | rs535978    | C   | G   | Intronic             |
| GLIS3  | chr9  | 3932479   | rs371770632 | G   | C   | Intronic             |
| GLIS3  | chr9  | 4118167   |             | C   | A   | Exonic-synonymous    |
| GLIS3  | chr9  | 4118922   |             | C   | T   | Intronic             |
| GLIS3  | chr9  | 4285986   | rs10758591  | G   | C   | Intronic             |
| GLIS3  | chr9  | 4286255   | rs117802495 | G   | A   | Exonic-synonymous    |
| GLIS3  | chr9  | 4286312   | rs370797710 | A   | T   | Exonic-synonymous    |
| GLIS3  | chr9  | 4286365   |             | T   | G   | Exonic-synonymous    |
| GMDS   | chr6  | 1624673   | rs371984133 | G   | A   | Intronic             |
| GMDS   | chr6  | 1624879   | rs115927032 | C   | T   | Intronic             |
| GMDS   | chr6  | 1726590   | rs41300829  | G   | A   | Intronic             |
| GMDS   | chr6  | 1742632   | rs146336419 | C   | T   | Intronic             |
| GMDS   | chr6  | 2115962   | rs11963303  | G   | A   | Intronic             |
| GMDS   | chr6  | 2115992   | rs17134693  | T   | C   | Intronic             |
| GMDS   | chr6  | 2116145   | rs369080253 | G   | C   | Intronic             |
| GMDS   | chr6  | 2124999   | rs1033533   | C   | G   | Intronic             |
| GMDS   | chr6  | 2245481   | rs138853519 | A   | G   | Intronic             |
| GMDS   | chr6  | 2245498   |             | G   | T   | Intronic             |

Table SII. Continued.

| Gene          | Chr   | Position  | dbSNP       | Ref | Alt | Func.refgene      |
|---------------|-------|-----------|-------------|-----|-----|-------------------|
| GMDS          | chr6  | 2245510   | rs370562357 | G   | T   | Intronic          |
| GNAZ          | chr22 | 23438116  | rs41296233  | C   | T   | Exonic-synonymous |
| GNAZ          | chr22 | 23438569  | rs17853740  | C   | T   | Exonic-synonymous |
| GNAZ          | chr22 | 23465564  | rs555717993 | C   | T   | Exonic-synonymous |
| HSD17B6       | chr12 | 57167590  |             | G   | T   | Intronic          |
| HSD17B6       | chr12 | 57178875  | rs535193208 | C   | G   | Intronic          |
| IPCEF1, OPRM1 | chr6  | 154533993 | rs75091793  | T   | C   | Intronic          |
| IPCEF1        | chr6  | 154535276 | rs9478525   | G   | A   | Intronic          |
| IPCEF1        | chr6  | 154542283 | rs549852112 | C   | G   | Intronic          |
| JAK2          | chr9  | 5050689   |             | C   | A   | Exonic-synonymous |
| JAK2          | chr9  | 5050840   |             | C   | G   | Intronic          |
| JAK2          | chr9  | 5066617   | rs186522660 | A   | T   | Intronic          |
| JAK2          | chr9  | 5072560   | rs146433914 | C   | T   | Exonic-synonymous |
| JAK2          | chr9  | 5078466   | rs200502073 | T   | C   | Intronic          |
| JAK2          | chr9  | 5080392   | rs192823036 | T   | C   | Intronic          |
| JAK2          | chr9  | 5089739   |             | C   | A   | Exonic-synonymous |
| JAK2          | chr9  | 5090448   |             | C   | A   | Exonic-synonymous |
| JAK2          | chr9  | 5090641   | rs10974955  | G   | A   | Intronic          |
| JAK2          | chr9  | 5090934   | rs2274649   | A   | T   | Intronic          |
| JMJD1C        | chr10 | 64928347  | rs200089221 | G   | A   | Intronic          |
| JMJD1C        | chr10 | 64937415  | rs2306263   | C   | T   | Intronic          |
| JMJD1C        | chr10 | 64946180  | rs150264825 | T   | C   | Intronic          |
| JMJD1C        | chr10 | 64952914  | rs372628812 | A   | G   | Intronic          |
| JMJD1C        | chr10 | 64960318  |             | G   | T   | Exonic-synonymous |
| JMJD1C        | chr10 | 64973853  |             | G   | T   | Exonic-synonymous |
| JMJD1C        | chr10 | 64973890  | rs112116567 | A   | G   | Exonic-synonymous |
| JMJD1C        | chr10 | 64974535  | rs142118527 | C   | T   | Exonic-synonymous |
| JMJD1C        | chr10 | 64976886  | rs68053125  | T   | G   | Intronic          |
| JMJD1C        | chr10 | 65140279  | rs117741358 | T   | C   | Intronic          |
| JMJD1C-AS1    | chr10 | 65225210  |             | G   | T   | ncRNA_exonic      |
| JMJD1C-AS1    | chr10 | 65225450  | rs1054693   | C   | T   | ncRNA_exonic      |
| KCNQ1         | chr11 | 2483030   |             | G   | T   | Intronic          |
| KCNQ1         | chr11 | 2549099   |             | G   | T   | Intronic          |
| KCNQ1         | chr11 | 2591893   | rs139042529 | C   | T   | Exonic-synonymous |
| KCNQ1         | chr11 | 2592554   |             | G   | T   | Splicing          |
| KCNQ1         | chr11 | 2592568   |             | C   | A   | Exonic-synonymous |
| KCNQ1         | chr11 | 2593185   | rs7128407   | C   | T   | Intronic          |
| KCNQ1         | chr11 | 2593386   | rs370720389 | C   | T   | Intronic          |
| KCNQ1         | chr11 | 2593959   | rs41282926  | G   | A   | Intronic          |
| KCNQ1         | chr11 | 2593977   | rs4930127   | A   | G   | Intronic          |
| KCNQ1         | chr11 | 2594277   | rs572923188 | C   | T   | Intronic          |
| KCNQ1         | chr11 | 2604635   |             | C   | T   | Intronic          |
| KCNQ1         | chr11 | 2604659   |             | C   | A   | Intronic          |
| KCNQ1         | chr11 | 2604715   |             | C   | A   | Exonic-synonymous |
| KCNQ1         | chr11 | 2606621   | rs56413900  | C   | T   | Intronic          |
| KCNQ1         | chr11 | 2608802   |             | C   | A   | Exonic-synonymous |
| KCNQ1         | chr11 | 2610103   | rs201053661 | G   | A   | Intronic          |
| KCNQ1         | chr11 | 2610113   | rs200638235 | G   | A   | Intronic          |
| KCNQ1         | chr11 | 2790163   | rs11024034  | T   | C   | Intronic          |
| KCNQ1         | chr11 | 2797128   |             | A   | G   | Intronic          |
| KCNQ1         | chr11 | 2797294   |             | G   | A   | Intronic          |
| KCNQ1         | chr11 | 2797305   | rs376557660 | G   | A   | Intronic          |
| KCNQ1         | chr11 | 2799380   | rs150950451 | G   | A   | Intronic          |
| KCNQ1OT1      | chr11 | 2683177   | rs28730758  | C   | T   | ncRNA_exonic      |

Table SII. Continued.

| Gene     | Chr   | Position  | dbSNP       | Ref | Alt | Func.refgene      |
|----------|-------|-----------|-------------|-----|-----|-------------------|
| KCNQ1OT1 | chr11 | 2683329   | rs12577654  | C   | T   | ncRNA_exonic      |
| KCNQ1OT1 | chr11 | 2683357   | rs760419    | A   | G   | ncRNA_exonic      |
| KLHL31   | chr6  | 53516516  | rs142726111 | C   | A   | Exonic-synonymous |
| KLHL31   | chr6  | 53517035  | rs3823111   | G   | A   | Exonic-synonymous |
| KLHL31   | chr6  | 53519062  | rs10948758  | A   | G   | Exonic-synonymous |
| KLHL31   | chr6  | 53519207  |             | G   | T   | Exonic-synonymous |
| KLHL31   | chr6  | 53519857  | rs12210809  | G   | A   | Exonic-synonymous |
| LDHAL6A  | chr11 | 18487305  | rs17851143  | C   | G   | Exonic-synonymous |
| LDHAL6A  | chr11 | 18499316  |             | A   | G   | Intronic          |
| LPAR1    | chr9  | 113638070 | rs182493473 | C   | A   | Intronic          |
| LPAR1    | chr9  | 113704224 | rs17788474  | A   | G   | Exonic-synonymous |
| LPAR1    | chr9  | 113800811 | rs150494808 | C   | T   | Upstream          |
| LPAR1    | chr9  | 113800858 | rs138115457 | T   | C   | Upstream          |
| LPAR1    | chr9  | 113800910 |             | G   | T   | Upstream          |
| LPAR1    | chr9  | 113800931 | rs77865995  | C   | T   | Upstream          |
| LRRFIP1  | chr2  | 238536246 | rs28364855  | C   | T   | UTR5              |
| LRRFIP1  | chr2  | 238536255 | rs10170083  | C   | G   | UTR5              |
| LRRFIP1  | chr2  | 238601230 | rs182990338 | C   | G   | Intronic          |
| LRRFIP1  | chr2  | 238617109 | rs150094393 | C   | G   | Intronic          |
| LRRFIP1  | chr2  | 238617320 | rs115274199 | G   | A   | Intronic          |
| LRRFIP1  | chr2  | 238617391 |             | C   | A   | Intronic          |
| LRRFIP1  | chr2  | 238617516 | rs143042974 | C   | A   | Intronic          |
| LRRFIP1  | chr2  | 238622855 |             | C   | G   | Intronic          |
| LRRFIP1  | chr2  | 238626455 |             | A   | C   | Intronic          |
| LRRFIP1  | chr2  | 238628220 | rs373273314 | G   | A   | Intronic          |
| LRRFIP1  | chr2  | 238629563 |             | G   | A   | Intronic          |
| LRRFIP1  | chr2  | 238632240 |             | C   | A   | Intronic          |
| LRRFIP1  | chr2  | 238642395 |             | G   | A   | Intronic          |
| LRRFIP1  | chr2  | 238643840 | rs56245924  | G   | A   | Intronic          |
| LRRFIP1  | chr2  | 238643990 | rs3769077   | G   | A   | Intronic          |
| LRRFIP1  | chr2  | 238647805 | rs3820808   | C   | G   | Intronic          |
| LRRFIP1  | chr2  | 238647848 | rs372597035 | G   | A   | Intronic          |
| LRRFIP1  | chr2  | 238657142 | rs11692182  | C   | T   | Intronic          |
| LRRFIP1  | chr2  | 238657746 | rs3769064   | A   | G   | Intronic          |
| LRRFIP1  | chr2  | 238659821 | rs146402354 | C   | T   | Intronic          |
| LRRFIP1  | chr2  | 238662107 | rs201084665 | C   | T   | Exonic-synonymous |
| LRRFIP1  | chr2  | 238664729 | rs56219042  | C   | G   | Intronic          |
| LRRFIP1  | chr2  | 238664884 | rs11680940  | T   | C   | Intronic          |
| LRRFIP1  | chr2  | 238667311 | rs7566942   | T   | C   | Intronic          |
| LRRFIP1  | chr2  | 238667552 | rs2279639   | T   | C   | Intronic          |
| LRRFIP1  | chr2  | 238671170 | rs3739047   | G   | A   | Intronic          |
| LRRFIP1  | chr2  | 238671196 | rs3739044   | T   | C   | Intronic          |
| LRRFIP1  | chr2  | 238671940 | rs15232     | C   | T   | Exonic-synonymous |
| LRRFIP1  | chr2  | 238672795 | rs12477133  | C   | T   | UTR3              |
| LRRFIP1  | chr2  | 238678549 |             | G   | T   | Intronic          |
| LRRFIP1  | chr2  | 238680678 | rs56219137  | A   | G   | Intronic          |
| MAP2K2   | chr19 | 4090572   | rs6629      | G   | A   | UTR3              |
| MAP2K2   | chr19 | 4090577   | rs145743390 | G   | A   | UTR3              |
| MAP2K2   | chr19 | 4095523   | rs41276854  | C   | T   | Intronic          |
| MAP2K2   | chr19 | 4097249   | .           | G   | A   | Intronic          |
| MAP2K2   | chr19 | 4099175   | .           | G   | A   | Intronic          |
| MAP2K2   | chr19 | 4101006   | rs202086678 | C   | T   | Intronic          |
| MAP2K2   | chr19 | 4101221   | rs201435249 | C   | T   | Intronic          |
| MAP2K2   | chr19 | 4102507   |             | G   | T   | Intronic          |
| MAP2K2   | chr19 | 4102530   | rs113772802 | G   | A   | Intronic          |

Table SII. Continued.

| Gene      | Chr   | Position  | dbSNP       | Ref | Alt | Func.refgene      |
|-----------|-------|-----------|-------------|-----|-----|-------------------|
| MAP2K2    | chr19 | 4110495   |             | G   | T   | Intronic          |
| MAP2K2    | chr19 | 4110699   | rs112996316 | C   | T   | Intronic          |
| MAP2K2    | chr19 | 4117528   | rs8157      | G   | A   | Exonic-synonymous |
| MAP2K2    | chr19 | 4123918   | .           | A   | G   | UTR5              |
| MAP2K2    | chr19 | 4110495   |             | G   | T   | Intronic          |
| MAP2K2    | chr19 | 4110699   | rs112996316 | C   | T   | Intronic          |
| MAP2K2    | chr19 | 4117528   | rs8157      | G   | A   | Exonic-synonymous |
| MAP2K2    | chr19 | 4123918   | .           | A   | G   | UTR5              |
| MAP2K4    | chr17 | 11924022  | rs188370673 | T   | C   | Upstream          |
| MAP2K4    | chr17 | 11998798  |             | C   | A   | Intronic          |
| MAP2K4    | chr17 | 11998803  | rs117308356 | C   | T   | Intronic          |
| MAP2K4    | chr17 | 12011076  |             | A   | G   | Intronic          |
| MAP2K4    | chr17 | 12032630  | rs557270571 | G   | T   | Intronic          |
| MAP2K4    | chr17 | 12044353  | rs76810515  | T   | C   | Intronic          |
| MAP2K4    | chr17 | 12044508  | rs55924570  | C   | A   | Exonic-synonymous |
| MAP2K4    | chr17 | 12044628  | .           | G   | A   | UTR3              |
| MAPK14    | chr6  | 36040579  |             | T   | C   | Intronic          |
| MAPK14    | chr6  | 36040937  | rs3730365   | C   | T   | Intronic          |
| MAPK14    | chr6  | 36041431  |             | A   | T   | Intronic          |
| MAPK14    | chr6  | 36041707  | rs3730326   | G   | T   | Intronic          |
| MAPK14    | chr6  | 36043748  | rs201408793 | C   | A   | Intronic          |
| MAPK14    | chr6  | 36044225  | rs3730366   | A   | G   | Intronic          |
| MAPK14    | chr6  | 36068041  | rs2815805   | T   | C   | Exonic-synonymous |
| MIPOL1    | chr14 | 7736054   | rs17106526  | T   | C   | Intronic          |
| MIPOL1    | chr14 | 37736092  | .           | T   | C   | Intronic          |
| MIPOL1    | chr14 | 37777731  |             | C   | A   | Intronic          |
| MIPOL1    | chr14 | 38014928  | rs17179204  | C   | T   | Intronic          |
| RAPGEF2   | chr4  | 160131622 | rs138067772 | C   | T   | Intergenic        |
| RAPGEF2   | chr4  | 160159949 | rs77229150  | C   | A   | Intergenic        |
| RAPGEF2   | chr4  | 160162402 | .           | A   | G   | Intergenic        |
| MRVII     | chr11 | 10624621  | .           | C   | T   | Intronic          |
| MRVII     | chr11 | 10624644  | rs190290919 | G   | C   | Intronic          |
| MRVII     | chr11 | 10624647  | rs200641260 | C   | T   | Intronic          |
| MRVII     | chr11 | 10649293  | rs35296427  | G   | A   | Exonic-synonymous |
| MRVII     | chr11 | 10649652  | rs78054600  | G   | A   | Intronic          |
| MRVII     | chr11 | 10650329  | rs2278125   | C   | T   | Exonic-synonymous |
| MRVII     | chr11 | 10650335  |             | G   | T   | Exonic-synonymous |
| MRVII     | chr11 | 10650350  | rs190761149 | G   | A   | Exonic-synonymous |
| MRVII     | chr11 | 10650443  |             | C   | A   | Intronic          |
| MRVII     | chr11 | 10651134  | rs112262864 | C   | T   | Exonic-synonymous |
| MRVII     | chr11 | 10653426  | rs10840450  | A   | G   | Intronic          |
| MRVII     | chr11 | 10653442  | rs77974559  | C   | G   | Intronic          |
| MRVII     | chr11 | 10715034  | rs150327526 | G   | A   | UTR5              |
| MRVII-AS1 | chr11 | 10597850  |             | A   | C   | ncRNA_intronic    |
| MRVII-AS1 | chr11 | 10603611  | rs370028241 | G   | A   | ncRNA_intronic    |
| MRVII-AS1 | chr11 | 10613162  | rs200359923 | G   | A   | ncRNA_intronic    |
| MRVII-AS1 | chr11 | 10614913  | rs72862310  | A   | G   | ncRNA_intronic    |
| MRVII-AS1 | chr11 | 10615176  | rs371992142 | G   | A   | ncRNA_intronic    |
| MRVII-AS1 | chr11 | 10615257  | rs117131664 | G   | T   | ncRNA_intronic    |
| MRVII-AS1 | chr11 | 10615687  | rs200472330 | G   | A   | ncRNA_exonic      |
| MTCL1     | chr18 | 8718666   | rs201830543 | G   | A   | Intronic          |
| MTCL1     | chr18 | 8720328   |             | C   | A   | Intronic          |
| MTCL1     | chr18 | 8720368   | rs73939505  | C   | T   | Exonic-synonymous |
| MTCL1     | chr18 | 8777724   | rs373821001 | C   | T   | Intronic          |
| MTCL1     | chr18 | 8783501   | rs143648570 | T   | G   | Intronic          |

Table SII. Continued.

| Gene  | Chr   | Position | dbSNP       | Ref | Alt | Func.refgene      |
|-------|-------|----------|-------------|-----|-----|-------------------|
| MTCL1 | chr18 | 8784487  | rs138167149 | C   | T   | Exonic-synonymous |
| MTCL1 | chr18 | 8785976  |             | C   | A   | Exonic-synonymous |
| MTCL1 | chr18 | 8792894  | rs112296307 | G   | A   | Intronic          |
| MTCL1 | chr18 | 8792991  | rs199831945 | A   | G   | Intronic          |
| MTCL1 | chr18 | 8796549  | rs112076971 | C   | T   | Intronic          |
| MTCL1 | chr18 | 8796551  | rs540278    | T   | G   | Intronic          |
| MTCL1 | chr18 | 8806815  | rs11877424  | A   | G   | Intronic          |
| MTCL1 | chr18 | 8807082  | .           | C   | T   | Intronic          |
| MTCL1 | chr18 | 8807111  |             | G   | T   | Intronic          |
| MTCL1 | chr18 | 8807162  | rs11872700  | T   | C   | Intronic          |
| MTCL1 | chr18 | 8809568  | rs690079    | G   | A   | Intronic          |
| MTCL1 | chr18 | 8819023  | rs142108234 | C   | T   | Exonic-synonymous |
| MTCL1 | chr18 | 8824706  | rs372236045 | C   | T   | Exonic-synonymous |
| MTCL1 | chr18 | 8825003  | rs114022207 | G   | A   | Exonic-synonymous |
| MTCL1 | chr18 | 8825081  | rs148702862 | C   | T   | Exonic-synonymous |
| MTCL1 | chr18 | 8825096  | rs113084211 | G   | A   | Exonic-synonymous |
| MTCL1 | chr18 | 8825192  | rs581894    | A   | G   | Exonic-synonymous |
| MTCL1 | chr18 | 8825399  | rs16954339  | C   | T   | Exonic-synonymous |
| MTCL1 | chr18 | 8828788  | rs17406924  | G   | A   | Intronic          |
| MTCL1 | chr18 | 8828898  |             | C   | A   | Intronic          |
| MTCL1 | chr18 | 8828952  | rs2242273   | C   | T   | UTR3              |
| MTCL1 | chr18 | 8829019  | rs35592049  | G   | T   | Intronic          |
| MTCL1 | chr18 | 8829035  | rs2170297   | G   | A   | Intronic          |
| MTCL1 | chr18 | 8829061  | rs145420274 | G   | A   | Intronic          |
| MTCL1 | chr18 | 8831615  | rs11665124  | G   | A   | UTR3              |
| MYO5B | chr18 | 47352955 | rs78657366  | T   | G   | Exonic-synonymous |
| MYO5B | chr18 | 47364009 | rs149010847 | G   | A   | Exonic-synonymous |
| MYO5B | chr18 | 47369644 |             | G   | T   | Exonic-synonymous |
| MYO5B | chr18 | 47369728 |             | G   | T   | Exonic-synonymous |
| MYO5B | chr18 | 47369758 | rs2276170   | C   | T   | Exonic-synonymous |
| MYO5B | chr18 | 47390526 | rs201760142 | G   | A   | Exonic-synonymous |
| MYO5B | chr18 | 47401935 | rs2276172   | C   | T   | Intronic          |
| MYO5B | chr18 | 47404124 | rs75971548  | A   | G   | Intronic          |
| MYO5B | chr18 | 47405530 | rs4939603   | C   | T   | Intronic          |
| MYO5B | chr18 | 47406863 | .           | C   | A   | Intronic          |
| MYO5B | chr18 | 47421425 |             | G   | A   | Exonic-synonymous |
| MYO5B | chr18 | 47433007 | rs151267350 | A   | G   | Intronic          |
| MYO5B | chr18 | 47438382 |             | C   | A   | Intronic          |
| MYO5B | chr18 | 47438607 |             | C   | A   | Intronic          |
| MYO5B | chr18 | 47438660 | rs2276167   | C   | T   | Intronic          |
| MYO5B | chr18 | 47455896 | rs200559863 | A   | G   | Exonic-synonymous |
| MYO5B | chr18 | 47462711 |             | G   | T   | Exonic-synonymous |
| MYO5B | chr18 | 47462799 | rs183646156 | C   | T   | Intronic          |
| MYO5B | chr18 | 47462804 | rs1787596   | G   | A   | Intronic          |
| MYO5B | chr18 | 47479744 | rs77785690  | G   | A   | Intronic          |
| MYO5B | chr18 | 47480625 | rs77851006  | T   | C   | Intronic          |
| MYO5B | chr18 | 47480639 | rs187153618 | A   | C   | Intronic          |
| MYO5B | chr18 | 47480849 | rs186568716 | G   | T   | Intronic          |
| MYO5B | chr18 | 47489430 | rs58191032  | G   | A   | Intronic          |
| MYO5B | chr18 | 47489480 | rs16951327  | C   | T   | Intronic          |
| MYO5B | chr18 | 47500836 | rs11082795  | G   | A   | Exonic-synonymous |
| MYO5B | chr18 | 47500989 | rs138582195 | T   | C   | Intronic          |
| MYO5B | chr18 | 47506778 | rs61177844  | T   | C   | Intronic          |
| MYO5B | chr18 | 47516704 | rs11875730  | C   | T   | Intronic          |
| MYO5B | chr18 | 47518652 | rs16951370  | A   | G   | Intronic          |

Table SII. Continued.

| Gene    | Chr   | Position  | dbSNP       | Ref | Alt | Func.refgene      |
|---------|-------|-----------|-------------|-----|-----|-------------------|
| MYO5B   | chr18 | 47527817  | rs12969222  | T   | G   | Intronic          |
| MYO5B   | chr18 | 47566483  | rs201912377 | G   | A   | Intronic          |
| MYO5B   | chr18 | 47623592  | rs79642388  | G   | A   | Intronic          |
| NUP210  | chr3  | 13360513  | rs184930    | C   | T   | Intronic          |
| NUP210  | chr3  | 13360687  |             | C   | A   | Intronic          |
| NUP210  | chr3  | 13361399  |             | G   | T   | Exonic-synonymous |
| NUP210  | chr3  | 13363856  | rs200132462 | C   | T   | Intronic          |
| NUP210  | chr3  | 13363874  | rs62232824  | G   | A   | Intronic          |
| NUP210  | chr3  | 13364876  | rs514084    | G   | T   | Exonic-synonymous |
| NUP210  | chr3  | 13367322  |             | G   | T   | Exonic-synonymous |
| NUP210  | chr3  | 13373893  | rs11918212  | G   | C   | Intronic          |
| NUP210  | chr3  | 13373956  |             | C   | A   | Intronic          |
| NUP210  | chr3  | 13377044  |             | G   | A   | Exonic-synonymous |
| NUP210  | chr3  | 13378214  |             | A   | C   | Intronic          |
| NUP210  | chr3  | 13378304  |             | G   | T   | Exonic-synonymous |
| NUP210  | chr3  | 13379400  | rs3773302   | C   | T   | Exonic-synonymous |
| NUP210  | chr3  | 13381539  | rs2271508   | C   | T   | Intronic          |
| NUP210  | chr3  | 13383540  | rs2271504   | A   | G   | Exonic-synonymous |
| NUP210  | chr3  | 13393631  | rs144623047 | G   | A   | Exonic-synonymous |
| NUP210  | chr3  | 13399752  |             | G   | T   | Exonic-synonymous |
| NUP210  | chr3  | 13399948  | rs6807718   | T   | C   | Intronic          |
| NUP210  | chr3  | 13413371  | rs41293405  | G   | A   | Exonic-synonymous |
| NUP210  | chr3  | 13417758  |             | A   | C   | Intronic          |
| NUP210  | chr3  | 13417770  | rs145634800 | G   | A   | Intronic          |
| NUP210  | chr3  | 13418947  | rs62232830  | G   | C   | Intronic          |
| NUP210  | chr3  | 13419165  | rs59575416  | G   | A   | Intronic          |
| NUP210  | chr3  | 13420383  | rs115522829 | C   | A   | Intronic          |
| NUP210  | chr3  | 13420428  |             | G   | T   | Exonic-synonymous |
| NUP210  | chr3  | 13421320  | rs7625586   | T   | C   | Intronic          |
| NUP210  | chr3  | 13432743  |             | C   | A   | Exonic-synonymous |
| NUP210  | chr3  | 13438830  | rs13066607  | A   | G   | Intronic          |
| NUP210  | chr3  | 13439005  | rs7628923   | A   | G   | Intronic          |
| NUP210  | chr3  | 13441452  | rs563369213 | C   | T   | Intronic          |
| PCK1    | chr20 | 56136408  | rs28383583  | G   | A   | Intronic          |
| PCK1    | chr20 | 56137081  |             | C   | A   | Intronic          |
| PCK1    | chr20 | 56137082  | rs181554736 | G   | A   | Intronic          |
| PCK1    | chr20 | 56137807  | rs1042523   | A   | G   | Exonic-synonymous |
| PCK1    | chr20 | 56138053  | rs537628761 | G   | A   | Intronic          |
| PCK1    | chr20 | 56138178  | rs28359544  | C   | T   | Exonic-synonymous |
| PCK1    | chr20 | 56138573  |             | C   | A   | Intronic          |
| PCK1    | chr20 | 56139358  | .           | C   | T   | Exonic-synonymous |
| PCK1    | chr20 | 56139415  | rs141878699 | G   | A   | Exonic-synonymous |
| PIK3CG  | chr7  | 106507997 | .           | C   | A   | UTR5              |
| PIK3CG  | chr7  | 106508057 | rs3729673   | C   | T   | Exonic-synonymous |
| PIK3CG  | chr7  | 106508285 |             | G   | A   | Exonic-synonymous |
| PIK3CG  | chr7  | 106509630 |             | C   | A   | Exonic-synonymous |
| PIK3CG  | chr7  | 106513352 |             | C   | A   | Exonic-synonymous |
| PIK3CG  | chr7  | 106520149 | rs200767793 | C   | T   | Intronic          |
| PIK3CG  | chr7  | 106520200 | rs41276172  | C   | G   | Intronic          |
| PIK3CG  | chr7  | 106523446 | rs849397    | A   | G   | Intronic          |
| PIK3CG  | chr7  | 106526551 | rs28763993  | A   | C   | Intronic          |
| PIP5K1B | chr9  | 71509599  | rs953036    | A   | G   | Intronic          |
| PIP5K1B | chr9  | 71549994  | rs201072884 | C   | T   | Intronic          |
| PIP5K1B | chr9  | 71549995  | rs188212589 | G   | A   | Intronic          |
| PIP5K1B | chr9  | 71555522  | rs10746974  | C   | T   | Intronic          |

Table SII. Continued.

| Gene    | Chr   | Position  | dbSNP       | Ref | Alt | Func.refgene      |
|---------|-------|-----------|-------------|-----|-----|-------------------|
| PIP5K1B | chr9  | 71555924  | rs74752903  | T   | C   | Intronic          |
| PRNP    | chr20 | 4679836   | rs78236631  | G   | A   | Intronic          |
| PRNP    | chr20 | 4680217   | rs8124214   | A   | G   | Exonic-synonymous |
| PRNP    | chr20 | 4680349   | .           | G   | A   | Exonic-synonymous |
| PRNP    | chr20 | 4680490   | rs539013899 | C   | T   | Exonic-synonymous |
| PRNP    | chr20 | 4680698   | rs116970629 | G   | A   | UTR3              |
| PSKH2   | chr8  | 87060611  |             | G   | A   | Downstream        |
| PSKH2   | chr8  | 87081855  |             | C   | A   | Upstream          |
| PSKH2   | chr8  | 87081873  |             | C   | A   | Upstream          |
| PTPN11  | chr12 | 112856983 | rs7973432   | C   | A   | Intronic          |
| PTPN11  | chr12 | 112891203 | rs41304351  | G   | C   | Intronic          |
| PTPN11  | chr12 | 112893748 |             | G   | T   | Intronic          |
| PTPN11  | chr12 | 112915434 | rs41279090  | C   | T   | Intronic          |
| PTPN11  | chr12 | 112919869 | rs12301915  | C   | A   | Intronic          |
| PTPN11  | chr12 | 112919928 | .           | C   | T   | Exonic-synonymous |
| PTPN11  | chr12 | 112926788 | rs368816519 | C   | G   | Intronic          |
| PTPN11  | chr12 | 112939853 | rs3741983   | C   | T   | Intronic          |
| PTPRD   | chr9  | 8338878   | rs3847286   | A   | C   | Intronic          |
| PTPRD   | chr9  | 8338886   | rs150903419 | G   | A   | Intronic          |
| PTPRD   | chr9  | 8340491   | rs41281781  | G   | T   | Intronic          |
| PTPRD   | chr9  | 8341628   | rs113343906 | C   | T   | Intronic          |
| PTPRD   | chr9  | 8375882   |             | G   | C   | Intronic          |
| PTPRD   | chr9  | 8375886   | rs117865820 | G   | A   | Intronic          |
| PTPRD   | chr9  | 8389364   | rs2279776   | C   | G   | Exonic-synonymous |
| PTPRD   | chr9  | 8404607   | rs138755135 | G   | A   | Exonic-synonymous |
| PTPRD   | chr9  | 8436560   | rs1359117   | A   | T   | Intronic          |
| PTPRD   | chr9  | 8436758   |             | T   | C   | Intronic          |
| PTPRD   | chr9  | 8437141   | rs10977104  | G   | C   | Intronic          |
| PTPRD   | chr9  | 8454566   | rs7031287   | T   | C   | Intronic          |
| PTPRD   | chr9  | 8460591   | rs34577174  | A   | G   | Intronic          |
| PTPRD   | chr9  | 8465598   | rs2281747   | A   | G   | Exonic-synonymous |
| PTPRD   | chr9  | 8470974   | rs1359120   | G   | A   | Intronic          |
| PTPRD   | chr9  | 8484039   | rs16928002  | C   | T   | Intronic          |
| PTPRD   | chr9  | 8485153   | rs139221909 | G   | A   | Intronic          |
| PTPRD   | chr9  | 8485183   | rs117199503 | T   | A   | Intronic          |
| PTPRD   | chr9  | 8485201   | rs13286908  | T   | C   | Intronic          |
| PTPRD   | chr9  | 8485435   | rs35777094  | G   | C   | Intronic          |
| PTPRD   | chr9  | 8485686   | rs7863060   | T   | C   | Intronic          |
| PTPRD   | chr9  | 8485689   | rs544664016 | T   | C   | Intronic          |
| PTPRD   | chr9  | 8485743   | rs200119622 | G   | A   | Intronic          |
| PTPRD   | chr9  | 8485802   | .           | A   | G   | Exonic-synonymous |
| PTPRD   | chr9  | 8485823   |             | C   | A   | Exonic-synonymou  |
| PTPRD   | chr9  | 8486132   | rs144111555 | G   | C   | Exonic-synonymous |
| PTPRD   | chr9  | 8486355   | rs183119115 | G   | A   | Intronic          |
| PTPRD   | chr9  | 8486482   | rs13292865  | T   | C   | Intronic          |
| PTPRD   | chr9  | 8500902   | rs61733168  | G   | A   | Exonic-synonymous |
| PTPRD   | chr9  | 8507502   | rs186924057 | C   | T   | Intronic          |
| PTPRD   | chr9  | 8517837   | rs79838662  | A   | G   | Intronic          |
| PTPRD   | chr9  | 8518098   | rs145325302 | C   | A   | Exonic-synonymous |
| PTPRD   | chr9  | 8518251   |             | G   | T   | Exonic-synonymous |
| PTPRD   | chr9  | 8518269   |             | C   | A   | Exonic-synonymous |
| PTPRD   | chr9  | 8518395   | rs3763653   | G   | A   | Exonic-synonymous |
| PTPRD   | chr9  | 8518470   | rs3763652   | C   | G   | Intronic          |
| PTPRD   | chr9  | 8521244   | rs3818346   | C   | T   | Intronic          |
| PTPRD   | chr9  | 8523557   | rs368623322 | A   | G   | Intronic          |

Table SII. Continued.

| Gene    | Chr   | Position  | dbSNP       | Ref | Alt | Func.refgene      |
|---------|-------|-----------|-------------|-----|-----|-------------------|
| PTPRD   | chr9  | 8524797   | rs191633839 | T   | C   | Intronic          |
| PTPRD   | chr9  | 8524808   | rs182338215 | C   | T   | Intronic          |
| PTPRD   | chr9  | 8524862   | rs72694784  | G   | A   | Intronic          |
| PTPRD   | chr9  | 8524921   |             | C   | A   | Intronic          |
| PTPRD   | chr9  | 8526540   | rs540626110 | C   | T   | Intronic          |
| PTPRD   | chr9  | 8633542   | rs187327262 | G   | A   | Intronic          |
| RAF1    | chr3  | 12626106  |             | C   | A   | Exonic-synonymous |
| RAF1    | chr3  | 12626588  |             | G   | T   | Intronic          |
| RAF1    | chr3  | 12626792  | rs187514758 | A   | G   | Intronic          |
| RAF1    | chr3  | 12629056  |             | G   | T   | Intronic          |
| RAF1    | chr3  | 12633168  | rs2290161   | A   | G   | Intronic          |
| RAF1    | chr3  | 12633260  |             | G   | T   | Exonic-synonymous |
| RAF1    | chr3  | 12641345  | rs369196677 | T   | C   | Intronic          |
| RAF1    | chr3  | 12641425  | rs5746223   | T   | C   | Intronic          |
| RAP1B   | chr12 | 69050235  | rs141697489 | G   | A   | Intronic          |
| RAP1B   | chr12 | 69050971  | rs201781080 | A   | G   | UTR3              |
| RAPGEF2 | chr4  | 160225553 | rs200475351 | C   | T   | Exonic-synonymous |
| RAPGEF2 | chr4  | 160251449 | rs55734414  | A   | G   | Intronic          |
| RAPGEF2 | chr4  | 160251451 | rs56024370  | A   | G   | Intronic          |
| RAPGEF2 | chr4  | 160253868 |             | C   | A   | Intronic          |
| RAPGEF2 | chr4  | 160259442 | rs116292425 | C   | G   | Intronic          |
| RAPGEF2 | chr4  | 160260209 | rs13127789  | G   | T   | Intronic          |
| RAPGEF2 | chr4  | 160260396 | rs61748171  | G   | A   | Exonic-synonymous |
| RAPGEF2 | chr4  | 160272310 | .           | A   | G   | Intronic          |
| RAPGEF2 | chr4  | 160274664 | .           | C   | A   | Exonic-synonymous |
| RAPGEF2 | chr4  | 160275116 | rs145873578 | G   | A   | Exonic-synonymous |
| RAPGEF2 | chr4  | 160277255 | .           | G   | A   | Exonic-synonymous |
| RAPGEF2 | chr4  | 160277276 | rs1135004   | C   | T   | Exonic-synonymous |
| RAPGEF2 | chr4  | 160279203 |             | C   | G   | Intronic          |
| RAPGEF2 | chr4  | 160279387 | rs556927096 | C   | T   | UTR3              |
| SHH     | chr7  | 155592844 | .           | T   | A   | Intergenic        |
| SHH     | chr7  | 155592864 | .           | C   | A   | Intergenic        |
| SHH     | chr7  | 155593201 |             | G   | T   | Intergenic        |
| SHH     | chr7  | 155593277 |             | T   | C   | Intergenic        |
| RGS7    | chr1  | 240975213 | rs2275742   | T   | C   | Intronic          |
| RGS7    | chr1  | 241031841 | rs181453607 | C   | T   | Intronic          |
| RGS7    | chr1  | 241032059 | .           | G   | T   | Intronic          |
| RGS7    | chr1  | 241093972 | rs3912109   | C   | G   | Intronic          |
| RGS7    | chr1  | 241099870 | rs115500158 | A   | G   | Intronic          |
| RGS7    | chr1  | 241099872 | rs77379720  | T   | C   | Intronic          |
| RGS7    | chr1  | 241261914 | rs180999285 | A   | C   | Intronic          |
| RGS7    | chr1  | 241262006 |             | C   | A   | Exonic-synonymous |
| SETBP1  | chr18 | 42449305  | rs647155    | G   | A   | Intronic          |
| SETBP1  | chr18 | 42530886  | rs150136756 | T   | G   | Exonic-synonymous |
| SETBP1  | chr18 | 42532026  |             | C   | A   | Exonic-synonymous |
| SETBP1  | chr18 | 42532290  |             | G   | T   | Exonic-synonymous |
| SETBP1  | chr18 | 42532533  | rs539686339 | G   | A   | Exonic-synonymous |
| SETBP1  | chr18 | 42532923  | rs34882016  | T   | C   | Exonic-synonymous |
| SETBP1  | chr18 | 42533106  |             | C   | A   | Exonic-synonymous |
| SETBP1  | chr18 | 42618610  | .           | G   | A   | Exonic-synonymous |
| SETBP1  | chr18 | 42643076  |             | C   | A   | Exonic-synonymous |
| SETBP1  | chr18 | 42643106  | rs145996171 | C   | A   | Exonic-synonymous |
| SGCZ    | chr8  | 13965569  | rs117754749 | A   | G   | Intronic          |
| SGCZ    | chr8  | 14022296  | rs6993740   | A   | T   | Intronic          |
| SGCZ    | chr8  | 15095076  | rs74672231  | G   | A   | Intronic          |

Table SII. Continued.

| Gene    | Chr   | Position  | dbSNP       | Ref | Alt | Func.refgene      |
|---------|-------|-----------|-------------|-----|-----|-------------------|
| SGCZ    | chr8  | 15095085  | rs4831331   | C   | G   | Intronic          |
| SHH     | chr7  | 155595960 |             | G   | A   | Exonic-synonymous |
| SHH     | chr7  | 155596413 | rs9333633   | C   | T   | Exonic-synonymous |
| SHH     | chr7  | 155596437 |             | G   | T   | Intronic          |
| SNHG22  | chr18 | 47367846  |             | C   | A   | ncRNA_intronic    |
| SNHG22  | chr18 | 47369844  | rs139580795 | G   | A   | ncRNA_intronic    |
| SNHG22  | chr18 | 47373466  | rs3017176   | G   | A   | ncRNA_intronic    |
| SNHG22  | chr18 | 47375932  | rs488890    | C   | G   | ncRNA_intronic    |
| ST3GAL3 | chr1  | 44257846  | rs201960656 | C   | A   | Intronic          |
| ST3GAL3 | chr1  | 44365165  |             | G   | A   | Intronic          |
| ST3GAL3 | chr1  | 44365273  | rs115003742 | C   | T   | Exonic-synonymous |
| ST3GAL3 | chr1  | 44365291  | rs12140044  | C   | T   | Exonic-synonymous |
| ST3GAL3 | chr1  | 44365457  | rs783304    | A   | G   | Intronic          |
| ST3GAL3 | chr1  | 44386282  |             | G   | T   | Intronic          |
| ST3GAL3 | chr1  | 44386445  | rs80055718  | G   | A   | Intronic          |
| ST3GAL3 | chr1  | 44386628  |             | C   | A   | Intronic          |
| ST3GAL4 | chr11 | 126276006 | rs190884962 | C   | T   | UTR5              |
| ST3GAL4 | chr11 | 126276959 | rs77689136  | G   | A   | Intronic          |
| ST3GAL4 | chr11 | 126277537 |             | G   | T   | Intronic          |
| ST3GAL4 | chr11 | 126277545 | rs554887290 | G   | A   | Intronic          |
| ST3GAL4 | chr11 | 126278027 | rs141211562 | C   | T   | Exonic-synonymous |
| ST3GAL4 | chr11 | 126278203 | rs2298475   | T   | C   | Exonic-synonymous |
| ST3GAL4 | chr11 | 126278444 | rs539310350 | G   | A   | Intronic          |
| ST3GAL4 | chr11 | 126283936 |             | C   | A   | Exonic-synonymous |
| STMN4   | chr8  | 27096677  | rs13276223  | A   | G   | Intronic          |
| STMN4   | chr8  | 27097329  | rs79575108  | C   | A   | Intronic          |
| STMN4   | chr8  | 27098715  | rs149089268 | G   | A   | Exonic-synonymous |
| STMN4   | chr8  | 27099879  | rs3739212   | C   | T   | Intronic          |
| STMN4   | chr8  | 27100014  | rs3739213   | G   | A   | Intronic          |
| STMN4   | chr8  | 27100052  | rs191650514 | C   | A   | Intronic          |
| STMN4   | chr8  | 27101204  | rs4733040   | T   | A   | Intronic          |
| STMN4   | chr8  | 27101206  | rs7830662   | A   | C   | Intronic          |
| SVIL    | chr10 | 29747221  | rs41299212  | G   | A   | Exonic-synonymous |
| SVIL    | chr10 | 29752485  | rs56022643  | G   | A   | Exonic-synonymous |
| SVIL    | chr10 | 29754543  | rs111548204 | C   | T   | Exonic-synonymous |
| SVIL    | chr10 | 29754675  | rs56248456  | A   | G   | Exonic-synonymous |
| SVIL    | chr10 | 29759237  |             | G   | T   | Exonic-synonymous |
| SVIL    | chr10 | 29769680  |             | C   | A   | Exonic-synonymous |
| SVIL    | chr10 | 29777508  | rs140019869 | G   | A   | Intronic          |
| SVIL    | chr10 | 29779936  | rs45519332  | G   | A   | Exonic-synonymous |
| SVIL    | chr10 | 29782066  | rs4749439   | A   | G   | Intronic          |
| SVIL    | chr10 | 29783813  | rs6481600   | G   | A   | Intronic          |
| SVIL    | chr10 | 29783856  | rs147715501 | C   | T   | Exonic-synonymous |
| SVIL    | chr10 | 29784004  | rs28427082  | G   | A   | Intronic          |
| SVIL    | chr10 | 29785454  | rs12414470  | C   | T   | Intronic          |
| SVIL    | chr10 | 29787997  | rs114540768 | G   | A   | Intronic          |
| SVIL    | chr10 | 29788082  |             | C   | A   | Exonic-synonymous |
| SVIL    | chr10 | 29788109  |             | C   | A   | Exonic-synonymous |
| SVIL    | chr10 | 29797131  | rs61849294  | G   | A   | Intronic          |
| SVIL    | chr10 | 29797240  |             | G   | T   | Intronic          |
| SVIL    | chr10 | 29797405  | rs16930338  | A   | G   | Intronic          |
| SVIL    | chr10 | 29801555  | rs60356120  | T   | C   | Intronic          |
| SVIL    | chr10 | 29801659  | rs56817459  | G   | A   | Intronic          |
| SVIL    | chr10 | 29801848  | rs12775779  | G   | A   | Intronic          |
| SVIL    | chr10 | 29811392  | rs146267453 | C   | A   | Exonic-synonymous |

Table SII. Continued.

| Gene     | Chr   | Position | dbSNP       | Ref | Alt | Func.refgene      |
|----------|-------|----------|-------------|-----|-----|-------------------|
| SVIL     | chr10 | 29811461 |             | C   | A   | Exonic-synonymous |
| SVIL     | chr10 | 29812789 |             | C   | A   | Exonic-synonymous |
| SVIL     | chr10 | 29813348 | rs61846562  | T   | G   | Intronic          |
| SVIL     | chr10 | 29813382 | rs61846563  | C   | T   | Intronic          |
| SVIL     | chr10 | 29813506 |             | C   | T   | Exonic-synonymous |
| SVIL     | chr10 | 29820122 | rs369422313 | A   | G   | Intronic          |
| SVIL     | chr10 | 29820936 |             | C   | A   | Exonic-synonymous |
| SVIL     | chr10 | 29821523 | rs1328323   | T   | C   | Exonic-synonymous |
| SVIL     | chr10 | 29824956 | rs143011277 | G   | A   | Exonic-synonymous |
| SVIL     | chr10 | 29839513 | rs10159964  | A   | G   | Intronic          |
| SVIL     | chr10 | 29839693 | rs141506698 | C   | T   | Exonic-synonymous |
| SVIL     | chr10 | 29844018 | rs375845375 | G   | C   | UTR5              |
| SVIL-AS1 | chr10 | 29747109 | rs41313816  | A   | G   | ncRNA_intronic    |
| SVIL-AS1 | chr10 | 29747166 | rs376294931 | G   | A   | ncRNA_intronic    |
| SVIL-AS1 | chr10 | 29751086 | rs117849440 | G   | A   | ncRNA_intronic    |
| SVIL-AS1 | chr10 | 29751092 | rs12777968  | G   | C   | ncRNA_intronic    |
| SVIL-AS1 | chr10 | 29756842 | rs199516107 | G   | A   | ncRNA_exonic      |
| SVIL-AS1 | chr10 | 29759427 | rs2274492   | G   | A   | ncRNA_intronic    |
| SVIL-AS1 | chr10 | 29759434 | rs2274493   | C   | T   | ncRNA_intronic    |
| SVIL-AS1 | chr10 | 29762946 |             | G   | T   | ncRNA_intronic    |
| SVIL-AS1 | chr10 | 29770502 |             | C   | A   | ncRNA_intronic    |
| SVIL-AS1 | chr10 | 29770692 |             | G   | T   | ncRNA_intronic    |
| SVIL-AS1 | chr10 | 29770732 |             | C   | A   | ncRNA_intronic    |
| SVIL-AS1 | chr10 | 29774905 | rs34518368  | C   | T   | ncRNA_intronic    |
| SVIL-AS1 | chr10 | 29775005 |             | G   | T   | ncRNA_intronic    |
| SVIL-AS1 | chr10 | 29776046 | rs139711576 | G   | A   | ncRNA_intronic    |
| SVIL-AS1 | chr10 | 29776277 |             | G   | T   | ncRNA_exonic      |
| TAOK1    | chr17 | 27778757 |             | G   | T   | Intronic          |
| TAOK1    | chr17 | 27807416 | rs56387760  | A   | G   | Exonic-synonymous |
| TAOK1    | chr17 | 27844593 | rs75790207  | A   | G   | Exonic-synonymous |
| TAOK1    | chr17 | 27861259 |             | C   | A   | Exonic-synonymous |
| TAOK1    | chr17 | 27870065 | rs139171312 | C   | T   | UTR3              |
| THSD4    | chr15 | 71507352 | rs28704071  | T   | A   | Intronic          |
| THSD4    | chr15 | 71507761 |             | G   | T   | Intronic          |
| THSD4    | chr15 | 71507764 | rs12324441  | G   | C   | Intronic          |
| THSD4    | chr15 | 71535458 | rs12440013  | G   | C   | Intronic          |
| THSD4    | chr15 | 71704288 | rs561505943 | C   | T   | Intronic          |
| THSD4    | chr15 | 71839637 | rs568720691 | C   | T   | UTR5              |
| THSD4    | chr15 | 72037530 |             | G   | T   | Exonic-synonymous |
| THSD4    | chr15 | 72037599 |             | C   | A   | Intronic          |
| THSD4    | chr15 | 72037600 | rs143257420 | G   | A   | Intronic          |
| THSD4    | chr15 | 72040957 | .           | G   | A   | Intronic          |
| THSD4    | chr15 | 72050139 | rs8026426   | C   | T   | Intronic          |
| THSD4    | chr15 | 72050436 | rs924555    | T   | C   | Intronic          |
| THSD4    | chr15 | 72050508 | rs924556    | G   | A   | Intronic          |
| THSD4    | chr15 | 72063436 |             | C   | A   | Exonic-synonymous |
| THSD4    | chr15 | 72069605 |             | C   | T   | Exonic-synonymous |
| THSD4    | chr15 | 72072967 |             | G   | C   | UTR3              |
| THSD4    | chr15 | 72072989 | rs200841286 | A   | T   | UTR3              |
| THSD4    | chr15 | 72073003 | rs2291275   | C   | T   | UTR3              |
| THSD4    | chr15 | 72073039 | rs34435520  | G   | A   | UTR3              |
| THSD4    | chr15 | 72073189 | rs17811309  | G   | A   | UTR3              |
| THSD4    | chr15 | 72073208 | .           | C   | T   | UTR3              |
| TRIM27   | chr6  | 28872036 | rs41270608  | G   | A   | Exonic-synonymous |
| TRIM27   | chr6  | 28888058 | rs114472201 | G   | A   | Intronic          |

Table SII. Continued.

| Gene     | Chr  | Position  | dbSNP       | Ref | Alt | Func.refgene      |
|----------|------|-----------|-------------|-----|-----|-------------------|
| UGT1A1   | chr2 | 234675567 | rs6708136   | C   | T   | Intronic          |
| UGT1A1   | chr2 | 234676458 | rs12471326  | T   | C   | Intronic          |
| UGT1A1   | chr2 | 234676504 |             | C   | A   | Exonic-synonymous |
| UGT1A1   | chr2 | 234676536 |             | G   | T   | Exonic-synonymous |
| UGT1A1   | chr2 | 234676593 | rs61764033  | C   | T   | Intronic          |
| UGT1A1   | chr2 | 234677014 |             | G   | T   | Exonic-synonymous |
| UGT1A1   | chr2 | 234678238 | rs199786512 | C   | T   | Intronic          |
| UGT1A1   | chr2 | 234678282 |             | G   | T   | Intronic          |
| UGT1A1   | chr2 | 234680887 | rs200350292 | C   | T   | Intronic          |
| UGT1A10  | chr2 | 234545294 | rs11683356  | G   | A   | Exonic-synonymous |
| VAMP8    | chr2 | 85804850  | rs370015241 | C   | T   | Intronic          |
| VAMP8    | chr2 | 85804917  | rs141129979 | C   | T   | Intronic          |
| VAMP8    | chr2 | 85806979  | rs181757413 | G   | A   | Intronic          |
| VAMP8    | chr2 | 85807017  |             | C   | A   | Intronic          |
| VAMP8    | chr2 | 85808871  | rs1058588   | C   | T   | UTR3              |
| VAV3     | chr1 | 108119007 | rs112984085 | G   | C   | Intronic          |
| VAV3     | chr1 | 108138961 | rs17229705  | T   | C   | Exonic-synonymous |
| VAV3     | chr1 | 108152630 | rs2296877   | G   | T   | Intronic          |
| VAV3     | chr1 | 108292013 | rs17229647  | T   | C   | Intronic          |
| VAV3     | chr1 | 108298001 | rs72979653  | C   | G   | Intronic          |
| VAV3     | chr1 | 108299809 | rs12138353  | G   | A   | Intronic          |
| VAV3     | chr1 | 108313258 | rs6583048   | C   | T   | Exonic-synonymous |
| VAV3     | chr1 | 108319891 | rs17020006  | A   | G   | Exonic-synonymous |
| VAV3     | chr1 | 108319965 | rs17235990  | G   | C   | Intronic          |
| VAV3-AS1 | chr1 | 108507209 | rs56193625  | G   | A   | ncRNA_intronic    |
| WBSCR17  | chr7 | 70597884  | rs61741535  | G   | A   | Exonic-synonymous |
| WBSCR17  | chr7 | 70597935  | rs145550936 | C   | T   | Exonic-synonymous |
| WBSCR17  | chr7 | 70598014  |             | C   | A   | Exonic-synonymous |
| WBSCR1   | chr7 | 70598104  | rs12673981  | C   | T   | Intronic          |
| WBSCR17  | chr7 | 70853118  | rs77859267  | C   | T   | Intronic          |
| WBSCR17  | chr7 | 70853164  | rs150802893 | A   | G   | Intronic          |
| WBSCR17  | chr7 | 70853465  |             | A   | C   | Intronic          |
| WBSCR17  | chr7 | 70885993  | rs61737661  | C   | T   | Exonic-synonymous |
| WBSCR17  | chr7 | 71036182  | rs66840657  | C   | T   | Intronic          |
| WBSCR17  | chr7 | 71036188  |             | C   | T   | Intronic          |
| WBSCR17  | chr7 | 71036425  | rs146138772 | T   | C   | Intronic          |
| WBSCR17  | chr7 | 71134923  | rs201781233 | T   | C   | Intronic          |
| WBSCR17  | chr7 | 71134983  | rs35612272  | C   | A   | Exonic-synonymous |
| WBSCR17  | chr7 | 71135043  | rs17143818  | C   | T   | Exonic-synonymous |
| WBSCR17  | chr7 | 71135103  |             | G   | T   | Intronic          |
| WBSCR17  | chr7 | 71142312  | rs73354138  | A   | G   | Intronic          |

Chr, chromosome; dbSNP, The Single Nucleotide Polymorphism database; Ref, reference; Alt, alternative; ncRNA, non-coding RNA; UTR, untranslated region; Func.reference, function of reference gene.

Table SIII. Complete list of all observed (irrespective of minor allele frequency) non- synonymous variants in all 54 sequenced genes in the study patients (controlled and stroke).

| Gene    | dbSNP       | Amino acid change                          | CADD  |
|---------|-------------|--------------------------------------------|-------|
| ADAMTS2 | rs144078893 | ADAMTS2:NM_014244:exon22:c.C3607T:p.R1203W | 13.64 |
| ADAMTS2 | .           | ADAMTS2:NM_014244:exon22:c.G3567T:p.K1189N | 15.70 |
| ADAMTS2 | rs1054480   | ADAMTS2:NM_014244:exon22:c.C3529T:p.P1177S | 10.57 |
| ADAMTS2 | .           | ADAMTS2:NM_014244:exon19:c.C2932A:p.R978S  | 8.772 |
| ADAMTS2 | .           | ADAMTS2:NM_014244:exon19:c.G2884A:p.A962T  | 16.16 |
| ADAMTS2 | rs367796431 | ADAMTS2:NM_014244:exon19:c.G2818A:p.V940M  | 18.13 |
| ADAMTS2 | .           | ADAMTS2:NM_014244:exon19:c.C2816A:p.S939Y  | 10.81 |
| ADAMTS2 | rs140022033 | ADAMTS2:NM_014244:exon19:c.G2795A:p.R932Q  | 15.61 |
| ADAMTS2 | rs141650732 | ADAMTS2:NM_014244:exon15:c.T2267C:p.V756A  | 4.300 |
| ADAMTS2 | .           | ADAMTS2:NM_014244:exon12:c.G1872C:p.E624D  | 17.15 |
| ADAMTS2 | .           | ADAMTS2:NM_014244:exon11:c.C1749A:p.F583L  | 18.15 |
| ADAMTS2 | .           | ADAMTS2:NM_014244:exon8:c.G1373T:p.R458L   | 26.3  |
| ADAMTS2 | .           | ADAMTS2:NM_014244:exon6:c.A1067G:p.H356R   | 14.20 |
| ADAMTS2 | rs117222015 | ADAMTS2:NM_014244:exon4:c.G764A:p.R255Q    | 9.462 |
| ADAMTS2 | rs398829    | ADAMTS2:NM_014244:exon4:c.G733A:p.V245I    | 3.478 |
| ADAMTS2 | rs11750821  | ADAMTS2:NM_014244:exon4:c.G722A:p.R241H    | 2.950 |
| AKT2    | rs142926499 | AKT2:NM_001243028:exon13:c.C1213T:p.R405W  | 28.3  |
| AKT2    | .           | AKT2:NM_001243028:exon11:c.G1020T:p.E340D  | 14.19 |
| AKT2    | .           | AKT2:NM_001243028:exon10:c.C883T:p.R295C   | 14.17 |
| AKT2    | rs200272953 | AKT2:NM_001243028:exon3:c.A26G:p.N9S       | 14.73 |
| AKT2    | .           | AKT2:NM_001243028:exon10:c.G880T:p.E294X   | 34    |
| ANKS1B  | .           | ANKS1B:NM_001204068:exon3:c.G308T:p.R103I  | 16.38 |
| ANKS1B  | rs77436242  | ANKS1B:NM_152788:exon13:c.C2240G:p.S747C   | 17.46 |
| ANKS1B  | .           | ANKS1B:NM_152788:exon12:c.G1586T:p.R529L   | 21.8  |
| ANKS1B  | rs148678454 | ANKS1B:NM_152788:exon11:c.G1456A:p.A486T   | 13.47 |
| ANKS1B  | .           | ANKS1B:NM_152788:exon7:c.C889T:p.P297S     | 0.295 |
| ANKS1B  | rs200240398 | ANKS1B:NM_152788:exon1:c.C50T:p.A17V       | 14.94 |
| ANKS1B  | .           | ANKS1B:NM_152788:exon13:c.G1888T:p.E630X   | 35    |
| ATP6V1F | .           | ATP6V1F:NM_001198909:exon1:c.C5T:p.A2V     | 31    |
| ATP6V1F | rs117627878 | ATP6V1F:NM_001198909:exon2:c.C218T:p.P73L  | 10.49 |
| ATP6V1F | rs200874610 | ATP6V1F:NM_004231:exon2:c.G301A:p.A101T    | 12.11 |
| ATP6V1F | .           | ATP6V1F:NM_004231:exon2:c.G306T:p.K102N    | 19.86 |
| ATP6V1F | .           | ATP6V1F:NM_004231:exon2:c.G320T:p.R107L    | 26.2  |
| COMMD7  | .           | COMMD7:NM_001099339:exon4:c.C256A:p.L86I   | 11.31 |
| COMMD7  | .           | COMMD7:NM_001099339:exon2:c.G100T:p.E34X   | 43    |
| CTCFL   | .           | CTCFL:NM_001269054:exon8:c.G1026T:p.K342N  | 1.848 |
| CTCFL   | .           | CTCFL:NM_001269048:exon6:c.T1291G:p.S431A  | 1.824 |
| CTCFL   | rs6070122   | CTCFL:NM_001269048:exon5:c.C1141G:p.Q381E  | 20.9  |
| CTCFL   | .           | CTCFL:NM_001269048:exon5:c.C1084A:p.R362S  | 19.81 |
| CTCFL   | rs6092491   | CTCFL:NM_001269054:exon6:c.G557A:p.R186H   | 11.86 |
| CTCFL   | rs41305825  | CTCFL:NM_001269054:exon6:c.A553G:p.M185V   | 4.324 |
| CTCFL   | .           | CTCFL:NM_001269054:exon5:c.G538T:p.D180Y   | 20.6  |
| CTCFL   | .           | CTCFL:NM_001269054:exon3:c.G203T:p.R68L    | 18.05 |
| CTCFL   | rs146122711 | CTCFL:NM_001269054:exon3:c.G199A:p.V67I    | 8.611 |
| CTCFL   | .           | CTCFL:NM_001269054:exon3:c.G163T:p.D55Y    | 16.32 |
| CTCFL   | rs146560816 | CTCFL:NM_001269041:exon2:c.A563T:p.K188M   | 11.04 |
| CTCFL   | rs6025606   | CTCFL:NM_001269041:exon1:c.A529G:p.T177A,  | 4.405 |
| CTCFL   | .           | CTCFL:NM_001269041:exon1:c.C466A:p.L156I   | 12.40 |
| CTCFL   | .           | CTCFL:NM_001269041:exon1:c.C181A:p.L61M    | 13.99 |
| CTCFL   | rs147244405 | CTCFL:NM_001269041:exon1:c.G152A:p.R51H    | 12.55 |
| CTCFL   | rs6070128   | CTCFL:NM_001269041:exon1:c.G148C:p.E50Q,   | 6.687 |
| CUBN    | rs1801232   | CUBN:NM_001081:exon66:c.C10656A:p.N3552K   | 2.114 |
| CUBN    | .           | CUBN:NM_001081:exon64:c.G10351T:p.D3451Y   | 16.12 |
| CUBN    | rs117035284 | CUBN:NM_001081:exon59:c.G9340A:p.G3114S    | 21.2  |

Table SIII. Continued.

| Gene  | dbSNP       | Amino acid change                          | CADD  |
|-------|-------------|--------------------------------------------|-------|
| CUBN  | .           | CUBN:NM_001081:exon58:c.G9217T:p.D3073Y    | 12.78 |
| CUBN  | .           | CUBN:NM_001081:exon57:c.C9075G:p.D3025E    | 13.46 |
| CUBN  | rs1801240   | CUBN:NM_001081:exon57:c.A9005G:p.E3002G    | 11.71 |
| CUBN  | rs115888073 | CUBN:NM_001081:exon57:c.G8968A:p.V2990I    | 8.734 |
| CUBN  | rs1801239   | CUBN:NM_001081:exon57:c.A8950G:p.I2984V    | 5.376 |
| CUBN  | rs45569534  | CUBN:NM_001081:exon56:c.G8902C:p.E2968Q    | 12.97 |
| CUBN  | rs45551835  | CUBN:NM_001081:exon55:c.C8741T:p.A2914V    | 23.2  |
| CUBN  | rs150488625 | CUBN:NM_001081:exon55:c.G8671A:p.V2891I    | 0.899 |
| CUBN  | rs1801238   | CUBN:NM_001081:exon55:c.C8635A:p.L2879I    | 14.23 |
| CUBN  | rs146847375 | CUBN:NM_001081:exon54:c.G8593A:p.V2865M    | 15.64 |
| CUBN  | rs141737312 | CUBN:NM_001081:exon53:c.C8399T:p.T2800I    | 15.52 |
| CUBN  | rs2796835   | CUBN:NM_001081:exon52:c.C8150G:p.S2717W    | 5.471 |
| CUBN  | rs3740168   | CUBN:NM_001081:exon50:c.C7724G:p.P2575R    | 7.428 |
| CUBN  | .           | CUBN:NM_001081:exon48:c.G7466T:p.R2489L    | 13.43 |
| CUBN  | rs117128556 | CUBN:NM_001081:exon48:c.T7365A:p.D2455E    | 6.203 |
| CUBN  | rs41301097  | CUBN:NM_001081:exon47:c.T7346C:p.M2449T    | 1.016 |
| CUBN  | .           | CUBN:NM_001081:exon45:c.G6950T:p.R2317L    | 15.95 |
| CUBN  | rs1276712   | CUBN:NM_001081:exon43:c.G6485A:p.C2162Y    | 0.018 |
| CUBN  | rs62619939  | CUBN:NM_001081:exon42:c.G6459C:p.L2153F    | 16.47 |
| CUBN  | rs150392211 | CUBN:NM_001081:exon40:c.A6091G:p.T2031A    | 13.58 |
| CUBN  | .           | CUBN:NM_001081:exon40:c.G6040T:p.D2014Y    | 13.36 |
| CUBN  | rs41289303  | CUBN:NM_001081:exon39:c.C5924T:p.P1975L    | 12.95 |
| CUBN  | rs41289305  | CUBN:NM_001081:exon39:c.A5803G:p.S1935G    | 8.719 |
| CUBN  | rs2271462   | CUBN:NM_001081:exon37:c.G5518A:p.G1840S    | 15.55 |
| CUBN  | .           | CUBN:NM_001081:exon37:c.A5467G:p.I1823V    | 7.063 |
| CUBN  | rs141640975 | CUBN:NM_001081:exon34:c.C5069T:p.A1690V    | 28.7  |
| CUBN  | rs1801231   | CUBN:NM_001081:exon31:c.C4675T:p.P1559S    | 9.394 |
| CUBN  | rs141164907 | CUBN:NM_001081:exon24:c.T3356C:p.L1119S    | 9.653 |
| CUBN  | .           | CUBN:NM_001081:exon22:c.C3088A:p.L1030I    | 2.755 |
| CUBN  | .           | CUBN:NM_001081:exon22:c.G3085T:p.D1029Y    | 10.28 |
| CUBN  | rs148869805 | CUBN:NM_001081:exon20:c.A2756G:p.H919R     | 8.685 |
| CUBN  | rs7905349   | CUBN:NM_001081:exon17:c.C2188T:p.H730Y     | 0.012 |
| CUBN  | .           | CUBN:NM_001081:exon17:c.C2184G:p.F728L     | 6.704 |
| CUBN  | .           | CUBN:NM_001081:exon14:c.A1664G:p.H555R     | 0.017 |
| CUBN  | rs1801224   | CUBN:NM_001081:exon11:c.C1165A:p.P389T     | 14.04 |
| CUBN  | rs1801222   | CUBN:NM_001081:exon8:c.T758C:p.F253S       | 2.587 |
| CUBN  | .           | CUBN:NM_001081:exon66:c.G10612T:p.E3538X   | 51    |
| CUBN  | .           | CUBN:NM_001081:exon43:c.C6560A:p.S2187X    | 47    |
| FBXL7 | rs201995635 | FBXL7:NM_001278317:exon3:c.A296G:p.N99S,   | 11.79 |
| FBXL7 | .           | FBXL7:NM_001278317:exon3:c.G506T:p.R169L,  | 13.11 |
| FBXL7 | .           | FBXL7:NM_001278317:exon4:c.G1088A:p.G363D, | 20.2  |
| GLIS3 | .           | GLIS3:NM_152629:exon10:c.C2287A:p.R763S,   | 32    |
| GLIS3 | rs149840771 | GLIS3:NM_152629:exon6:c.G1631A:p.R544H,    | 7.569 |
| GLIS3 | .           | GLIS3:NM_152629:exon4:c.G1391T:p.R464L,    | 30    |
| GLIS3 | .           | GLIS3:NM_152629:exon3:c.G1114T:p.D372Y,    | 24.0  |
| GLIS3 | rs72687988  | GLIS3:NM_152629:exon3:c.G1080C:p.E360D,    | 14.09 |
| GLIS3 | .           | GLIS3:NM_152629:exon3:c.G1069T:p.D357Y,    | 16.76 |
| GLIS3 | rs6415788   | GLIS3:NM_152629:exon3:c.C902A:p.P301Q,     | 1.187 |
| GLIS3 | .           | GLIS3:NM_152629:exon3:c.C887A:p.P296H,     | 5.620 |
| GLIS3 | .           | GLIS3:NM_152629:exon3:c.C784A:p.L262M,     | 8.959 |
| GLIS3 | rs138497710 | GLIS3:NM_152629:exon3:c.G726C:p.Q242H,     | 15.66 |
| GLIS3 | rs148572278 | GLIS3:NM_152629:exon3:c.C428A:p.S143Y,     | 22.1  |
| GLIS3 | rs113754532 | GLIS3:NM_001042413:exon2:c.A82G:p.I28V     | 13.74 |
| GLIS3 | .           | GLIS3:NM_152629:exon5:c.G1498T:p.E500X,    | 44    |
| GLIS3 | .           | GLIS3:NM_152629:exon3:c.G1099T:p.E367X,    | 39    |

Table III. Continued.

| Gene    | dbSNP       | Amino acid change                             | CADD  |
|---------|-------------|-----------------------------------------------|-------|
| GMDS    | .           | GMDS:NM_001253846:exon10:c.G909T:p.Q303H,     | 11.88 |
| GNAZ    | .           | GNAZ:NM_002073:exon2:c.G295T:p.D99Y           | 16.26 |
| GNAZ    | .           | GNAZ:NM_002073:exon2:c.G475T:p.D159Y          | 24.8  |
| GNAZ    | .           | GNAZ:NM_002073:exon3:c.G842A:p.R281H          | 19.63 |
| GNAZ    | rs545366122 | GNAZ:NM_002073:exon3:c.G901A:p.A301T          | 36    |
| HSD17B6 | .           | HSD17B6:NM_003725:exon2:c.G112T:p.D38Y        | 28.5  |
| HSD17B6 | .           | HSD17B6:NM_003725:exon5:c.G796T:p.D266Y       | 15.28 |
| JAK2    | rs150221602 | JAK2:NM_004972:exon19:c.G2538C:p.E846D        | 14.82 |
| JAK2    | rs41316003  | JAK2:NM_004972:exon24:c.G3188A:p.R1063H       | 15.39 |
| JAK2    | rs142269166 | JAK2:NM_004972:exon25:c.A3323G:p.N1108S       | 9.816 |
| JMJD1C  | rs1935      | JMJD1C:NM_001282948:exon25:c.G7059C:p.E2353D  | 15.29 |
| JMJD1C  | .           | JMJD1C:NM_001282948:exon17:c.G5762T:p.R1921L, | 25.6  |
| JMJD1C  | rs41274064  | JMJD1C:NM_001282948:exon15:c.C5393T:p.P1798L  | 11.74 |
| JMJD1C  | .           | JMJD1C:NM_001282948:exon9:c.A3391G:p.T1131A,  | 9.345 |
| JMJD1C  | .           | JMJD1C:NM_001282948:exon9:c.C3298A:p.L1100I,  | 8.498 |
| JMJD1C  | .           | JMJD1C:NM_001282948:exon9:c.C2852A:p.P951H,   | 16.28 |
| JMJD1C  | .           | JMJD1C:NM_001282948:exon9:c.G2589T:p.E863D,   | 3.322 |
| JMJD1C  | rs201696710 | JMJD1C:NM_001282948:exon7:c.A2033G:p.Y678C    | 16.65 |
| JMJD1C  | rs41274068  | JMJD1C:NM_001282948:exon7:c.C1403T:p.T468I    | 13.45 |
| JMJD1C  | rs41274072  | JMJD1C:NM_001282948:exon7:c.A1225G:p.M409V    | 0.669 |
| JMJD1C  | .           | JMJD1C:NM_001282948:exon7:c.C1094A:p.S365Y,   | 7.739 |
| JMJD1C  | rs41274074  | JMJD1C:NM_001282948:exon7:c.C1001G:p.T334S    | 7.911 |
| JMJD1C  | rs10761725  | JMJD1C:NM_001282948:exon7:c.T844A:p.S282T,    | 7.754 |
| JMJD1C  | rs151186255 | JMJD1C:NM_001282948:exon7:c.T833C:p.M278T,    | 0.049 |
| JMJD1C  | rs200016210 | JMJD1C:NM_001282948:exon7:c.G574C:p.D192H,    | 19.06 |
| JMJD1C  | rs201497554 | JMJD1C:NM_001282948:exon6:c.G413A:p.S138N,    | 22.2  |
| JMJD1C  | rs370533547 | JMJD1C:NM_001282948:exon6:c.G383A:p.R128H,    | 15.06 |
| JMJD1C  | rs34798625  | JMJD1C:NM_001282948:exon5:c.G268A:p.A90T,     | 7.055 |
| JMJD1C  | .           | JMJD1C:NM_001282948:exon25:c.G7045T:p.E2349X  | 48    |
| KCNQ1   | .           | KCNQ1:NM_181798:exon1:c.G4T:p.D2Y             | 5.3   |
| KCNQ1   | rs199472712 | KCNQ1:NM_000218:exon5:c.G724T:p.D242Y,        | 19.35 |
| KCNQ1   | .           | KCNQ1:NM_000218:exon6:c.G855T:p.K285N,        | 15.48 |
| KCNQ1   | rs12720457  | KCNQ1:NM_000218:exon9:c.G1179T:p.K393N        | 6.56  |
| KCNQ1   | .           | KCNQ1:NM_000218:exon12:c.G1545T:p.K515N       | 13.22 |
| KCNQ1   | rs147445322 | KCNQ1:NM_000218:exon16:c.G1831A:p.D611N       | 13.42 |
| KCNQ1   | .           | KCNQ1:NM_000218:C1637A:pS546X                 | 39    |
| KCNQ1   | rs199472793 | KCNQ1:NM_000218: c.1597T:p.R533W              | 15.28 |
| KLHL31  | rs200137077 | KLHL31:NM_001003760:exon3:c.G1541C:p.R514T    | 19.78 |
| KLHL31  | rs3799261   | KLHL31:NM_001003760:exon3:c.G1522A:p.A508T    | 17.41 |
| KLHL31  | rs61745239  | KLHL31:NM_001003760:exon3:c.G1432T:p.A478S    | 19.72 |
| KLHL31  | rs149644917 | KLHL31:NM_001003760:exon2:c.T713C:p.M238T     | 8.078 |
| KLHL31  | rs3799260   | KLHL31:NM_001003760:exon2:c.G466A:p.V156I     | 13.41 |
| LDHAL6A | .           | LDHAL6A:NM_144972:exon3:c.G259A:p.A87T        | 18.01 |
| LDHAL6A | rs201761125 | LDHAL6A:NM_144972:exon3:c.C295T:p.R99C,       | 15.07 |
| LDHAL6A | rs140413894 | LDHAL6A:NM_144972:exon3:c.G335T:p.R112L       | 18.54 |
| LDHAL6A | rs201642140 | LDHAL6A:NM_144972:exon4:c.G512A:p.R171H       | 16.29 |
| LDHAL6A | .           | LDHAL6A:NM_144972:exon5:c.G636T:p.K212N,      | 17.48 |
| LPAR1   | rs372111806 | LPAR1:NM_001401:exon3:c.G529A:p.V177I,        | 5.776 |
| LPAR1   | rs147151638 | LPAR1:NM_001401:exon3:c.A181G:p.I61V,         | 1.493 |
| LRRFIP1 | rs188452721 | LRRFIP1:NM_001137550:exon7:c.G379A:p.A127T    | 11.11 |
| LRRFIP1 | rs201910589 | LRRFIP1:NM_001137550:exon9:c.G488T:p.R163L    | 10.34 |
| LRRFIP1 | rs3213869   | LRRFIP1:NM_001137551:exon7:c.A656G:p.Q219R,   | 11.89 |
| LRRFIP1 | rs2001301   | LRRFIP1:NM_001137553:exon8:c.A1085G:p.N362S   | 0.920 |
| LRRFIP1 | .           | LRRFIP1:NM_001137551:exon9:c.G833T:p.R278L    | 2.955 |
| LRRFIP1 | .           | LRRFIP1:NM_001137551:exon9:c.G865T:p.D289Y    | 17.81 |

Table III. Continued.

| Gene    | dbSNP       | Amino acid change                           | CADD  |
|---------|-------------|---------------------------------------------|-------|
| LRRFIP1 | .           | LRRFIP1:NM_001137551:exon7:c.C701A:p.S234X  | 38    |
| LRRFIP1 | .           | LRRFIP1:NM_001137553:exon8:c.G844T:p.E282X  | 25.0  |
| LRRFIP1 | .           | LRRFIP1:NM_001137553:exon8:c.C2156A:p.S719X | 37    |
| MAP2K2  | .           | MAP2K2:NM_030662:exon7:c.C782T:p.A261V      | 21.5  |
| MIPOL1  | .           | MIPOL1:NM_138731:exon6:c.C335T:p.T112       | 18.19 |
| MIPOL1  | .           | MIPOL1:NM_138731:exon11:c.C925T:p.R309C     | 22.6  |
| MRV11   | .           | MRV11:NM_001206881:exon11:c.C706A:p.L236M   | 17.53 |
| MRV11   | rs202119960 | MRV11:NM_001206881:exon7:c.G334A:p.G112S    | 1.874 |
| MRV11   | rs74898367  | MRV11:NM_001098579:exon8:c.A880G:p.T294A    | 2.901 |
| MRV11   | .           | MRV11:NM_001098579:exon2:c.G283T:p.D95Y     | 16.62 |
| MRV11   | rs2162044   | MRV11:NM_001098579:exon2:c.G208A:p.A70T     | 2.999 |
| MRV11   | .           | MRV11:NM_001098579:exon1:c.G147T:p.E49D     | 16.23 |
| MRV11   | rs4909945   | MRV11:NM_001098579:exon1:c.A31G:p.I11V      | 3.218 |
| MRV11   | rs10770136  | MRV11:NM_001206880:exon1:c.A26G:p.E9G       | 11.23 |
| MTCL1   | .           | MTCL1:NM_015210:exon6:c.G608T:p.R203L       | 15.83 |
| MTCL1   | rs35739383  | MTCL1:NM_015210:exon6:c.T725C:p.M242T       | 10.08 |
| MTCL1   | rs199867297 | MTCL1:NM_015210:exon6:c.C1172T:p.A391V      | 2.432 |
| MTCL1   | .           | MTCL1:NM_015210:exon6:c.G1182T:p.K394N      | 7.023 |
| MTCL1   | .           | MTCL1:NM_015210:exon6:c.G1249T:p.D417Y      | 10.19 |
| MTCL1   | .           | MTCL1:NM_015210:exon6:c.G1291T:p.G431W      | 1.630 |
| MTCL1   | rs115077293 | MTCL1:NM_015210:exon6:c.C1445T:p.A482V      | 1.869 |
| MTCL1   | rs1965665   | MTCL1:NM_015210:exon6:c.A1502G:p.Q501R      | 0.001 |
| MTCL1   | rs143118025 | MTCL1:NM_015210:exon6:c.T1607C:p.I536T      | 3.140 |
| MTCL1   | rs202096044 | MTCL1:NM_015210:exon7:c.G1829A:p.R610H      | 11.45 |
| MTCL1   | .           | MTCL1:NM_015210:exon10:c.G2326T:p.D776Y     | 15.35 |
| MTCL1   | rs200421486 | MTCL1:NM_015210:exon10:c.G2399A:p.R800Q     | 14.84 |
| MTCL1   | .           | MTCL1:NM_015210:exon12:c.G2791T:p.D931Y     | 19.92 |
| MTCL1   | .           | MTCL1:NM_015210:exon13:c.G2903A:p.C968Y     | 14.85 |
| MTCL1   | .           | MTCL1:NM_015210:exon13:c.C2926A:p.R976S     | 16.90 |
| MTCL1   | rs145205841 | MTCL1:NM_015210:exon13:c.G3127A:p.E1043K    | 14.39 |
| MTCL1   | rs55676538  | MTCL1:NM_015210:exon13:c.C3145T:p.R1049C    | 5.158 |
| MTCL1   | .           | MTCL1:NM_015210:exon15:c.G3377A:p.G1126D    | 0.016 |
| MTCL1   | .           | MTCL1:NM_015210:exon15:c.C3517T:p.H1173Y    | 13.32 |
| MTCL1   | rs115783507 | MTCL1:NM_015210:exon15:c.C3763T:p.R1255C    | 2.166 |
| MTCL1   | rs114965084 | MTCL1:NM_015210:exon15:c.G3901A:p.E1301K    | 5.101 |
| MTCL1   | .           | MTCL1:NM_015210:exon15:c.G3915T:p.K1305N    | 16.77 |
| MTCL1   | .           | MTCL1:NM_015210:exon15:c.G4012T:p.G1338C    | 9.505 |
| MTCL1   | .           | MTCL1:NM_015210:exon15:c.G4399T:p.G1467C    | 15.45 |
| MYO5B   | .           | MYO5B:NM_001080467:exon40:c.G5494T:p.D1832Y | 27.4  |
| MYO5B   | .           | MYO5B:NM_001080467:exon39:c.G5384T:p.R1795L | 29.2  |
| MYO5B   | rs138128932 | MYO5B:NM_001080467:exon37:c.T5108C:p.V1703A | 14.46 |
| MYO5B   | rs112417235 | MYO5B:NM_001080467:exon37:c.A5062G:p.M1688V | 11.24 |
| MYO5B   | .           | MYO5B:NM_001080467:exon37:c.T4957A:p.C1653S | 10.33 |
| MYO5B   | .           | MYO5B:NM_001080467:exon34:c.G4552T:p.D1518Y | 23.3  |
| MYO5B   | rs201914259 | MYO5B:NM_001080467:exon33:c.G4445A:p.R1482Q | 17.50 |
| MYO5B   | rs531744417 | MYO5B:NM_001080467:exon33:c.C4444T:p.R1482W | 17.16 |
| MYO5B   | rs145598498 | MYO5B:NM_001080467:exon31:c.C4145T:p.T1382M | 13.28 |
| MYO5B   | .           | MYO5B:NM_001080467:exon31:c.C4123G:p.Q1375E | 14.67 |
| MYO5B   | rs2298624   | MYO5B:NM_001080467:exon21:c.G2753A:p.R918H  | 21.3  |
| MYO5B   | .           | MYO5B:NM_001080467:exon21:c.C2650T:p.R884W  | 14.80 |
| MYO5B   | .           | MYO5B:NM_001080467:exon21:c.G2630A:p.R877H  | 24.3  |
| MYO5B   | .           | MYO5B:NM_001080467:exon20:c.C2470A:p.R824S  | 21.6  |
| MYO5B   | rs370511121 | MYO5B:NM_001080467:exon19:c.A2305G:p.I769V  | 13.33 |
| MYO5B   | .           | MYO5B:NM_001080467:exon10:c.G1088T:p.R363L  | 12.46 |
| MYO5B   | rs189027956 | MYO5B:NM_001080467:exon9:c.G1031A:p.R344H   | 27.0  |

Table III. Continued.

| Gene    | dbSNP       | Amino acid change                           | CADD  |
|---------|-------------|---------------------------------------------|-------|
| MYO5B   | rs17659179  | MYO5B:NM_001080467:exon8:c.G921T:p.K307N    | 12.28 |
| MYO5B   | rs1815930   | MYO5B:NM_001080467:exon4:c.A376G:p.T126A    | 9.724 |
| MYO5B   | rs141998504 | MYO5B:NM_001080467:exon3:c.G145C:p.E49Q     | 11.82 |
| NUP210  | rs201198335 | NUP210:NM_024923:exon40:c.C5573T:p.A1858V   | 12.24 |
| NUP210  | rs149611952 | NUP210:NM_024923:exon37:c.G5369A:p.R1790H   | 9.432 |
| NUP210  | rs354478    | NUP210:NM_024923:exon37:c.G5359A:p.V1787M   | 6.201 |
| NUP210  | rs354479    | NUP210:NM_024923:exon37:c.T5255C:p.L1752S   | 5.083 |
| NUP210  | rs199752879 | NUP210:NM_024923:exon34:c.G4741A:p.V1581M   | 11.56 |
| NUP210  | rs144770995 | NUP210:NM_024923:exon26:c.C3517T:p.R1173C   | 10.53 |
| NUP210  | rs114096350 | NUP210:NM_024923:exon25:c.G3406A:p.G1136S   | 8.982 |
| NUP210  | .           | NUP210:NM_024923:exon25:c.G3351T:p.E1117D   | 12.96 |
| NUP210  | rs151008831 | NUP210:NM_024923:exon23:c.G3154A:p.G1052S   | 17.83 |
| NUP210  | rs2271502   | NUP210:NM_024923:exon21:c.T2891C:p.V964A    | 3.957 |
| NUP210  | rs200277108 | NUP210:NM_024923:exon20:c.C2735T:p.A912V    | 0.014 |
| NUP210  | rs2280084   | NUP210:NM_024923:exon17:c.G2357T:p.R786L    | 1.769 |
| NUP210  | rs6795271   | NUP210:NM_024923:exon16:c.C2264T:p.A755V    | 2.929 |
| NUP210  | rs3732671   | NUP210:NM_024923:exon14:c.A1822G:p.I608V    | 0.006 |
| NUP210  | rs7628051   | NUP210:NM_024923:exon7:c.G889A:p.A297T      | 5.556 |
| PCK1    | .           | PCK1:NM_002591:exon2:c.C219G:p.D73E         | 11.90 |
| PCK1    | rs707555    | PCK1:NM_002591:exon4:c.G550C:p.V184L        | 3.147 |
| PCK1    | rs8192708   | PCK1:NM_002591:exon6:c.A799G:p.I267V        | 15.76 |
| PCK1    | rs11552145  | PCK1:NM_002591:exon6:c.G826A:p.E276K        | 1.662 |
| PCK1    | rs45603039  | PCK1:NM_002591:exon6:c.G922A:p.V308I        | 21.4  |
| PCK1    | .           | PCK1:NM_002591:exon6:c.G961T:p.G321C        | 18.36 |
| PCK1    | rs1804160   | PCK1:NM_002591:exon7:c.G1102A:p.V368I       | 9.324 |
| PIK3CG  | .           | PIK3CG:NM_001282426:exon2:c.C1075A:p.R359S  | 7.854 |
| PIK3CG  | rs144565710 | PIK3CG:NM_001282426:exon2:c.G1076A:p.R359H  | 14.53 |
| PIK3CG  | .           | PIK3CG:NM_001282426:exon2:c.G1132T:p.D378Y  | 14.29 |
| PIK3CG  | rs17847825  | PIK3CG:NM_001282426:exon2:c.C1325A:p.S442Y  | 10.63 |
| PIK3CG  | rs61749915  | PIK3CG:NM_001282426:exon2:c.A1565G:p.N522S  | 5.523 |
| PIK3CG  | rs28763991  | PIK3CG:NM_001282426:exon7:c.A2569G:p.T857A  | 7.177 |
| PIP5K1B | rs61752950  | PIP5K1B:NM_001278253:exon3:c.C29A:p.A10E    | 16.08 |
| PIP5K1B | rs55897616  | PIP5K1B:NM_001278253:exon12:c.G1243A:p.A415 | 6.527 |
| PRNP    | .           | PRNP:NM_000311:exon2:c.G379A:p.G127S        | 24.1  |
| PRNP    | rs1799990   | PRNP:NM_000311:exon2:c.A385G:p.M129V        | 11.91 |
| PRNP    | .           | PRNP:NM_000311:exon2:c.C689A:p.S230X        | 8.154 |
| PSKH2   | rs16876805  | PSKH2:NM_033126:exon3:c.A1006G:p.I336V      | 9.823 |
| PSKH2   | rs6998760   | PSKH2:NM_033126:exon2:c.G526T:p.A176S       | 0.004 |
| PTAFR   | .           | PTAFR:NM_000952:exon2:c.G125T:p.R42L,PTAFR  | 14.45 |
| PTGIR   | rs200213497 | PTGIR:NM_000960:exon2:c.T44C:p.V15A         | 4.849 |
| PTPN11  | .           | PTPN11:NM_002834:exon11:c.G1341T:p.E447D    | 14.03 |
| PTPRD   | rs201751722 | PTPRD:NM_001171025:exon13:c.G2189A:p.R730H, | 27.2  |
| PTPRD   | rs35929428  | PTPRD:NM_002839:exon28:c.C2983T:p.R995C     | 12.34 |
| PTPRD   | rs72694737  | PTPRD:NM_002839:exon26:c.A2341G:p.T781A     | 6.679 |
| PTPRD   | rs10977171  | PTPRD:NM_001171025:exon8:c.C1309G:p.Q437E,  | 5.702 |
| PTPRD   | .           | PTPRD:NM_001040712:exon7:c.G677T:p.R226L    | 12.90 |
| PTPRJ   | .           | PTPRJ:NM_001098503:exon4:c.G579T:p.E193D    | 14.26 |
| PTPRJ   | rs1503185   | PTPRJ:NM_001098503:exon6:c.G977A:p.R326Q    | 3.170 |
| PTPRJ   | .           | PTPRJ:NM_001098503:exon6:c.C991A:p.L331M    | 14.38 |
| PTPRJ   | rs373034804 | PTPRJ:NM_001098503:exon7:c.C1211T:p.A404V   | 13.18 |
| PTPRJ   | rs61739179  | PTPRJ:NM_001098503:exon7:c.G1253A:p.R418H   | 10.93 |
| PTPRJ   | rs4752904   | PTPRJ:NM_002843:exon13:c.G2616C:p.E872D     | 4.648 |
| RAF1    | rs555034652 | RAF1:NM_002880:exon9:c.G934A:p.V312M        | 12.39 |
| RAPGEF2 | rs61758817  | RAPGEF2:NM_014247:exon22:c.C4097T:p.T1366M  | 13.15 |
| RAPGEF2 | .           | RAPGEF2:NM_014247:exon23:c.G4307T:p.R1436L  | 19.70 |

Table III. Continued.

| Gene    | dbSNP       | Amino acid change                            | CADD  |
|---------|-------------|----------------------------------------------|-------|
| RGS18   | rs112220830 | RGS18:NM_130782:exon4:c.G374T:p.S125I        | 0.354 |
| RGS7    | .           | RGS7:NM_001282773:exon11:c.G721T:p.D241Y     | 27.9  |
| SETBP1  | rs663651    | SETBP1:NM_001130110:exon4:c.G664A:p.A222T    | 1.344 |
| SETBP1  | .           | SETBP1:NM_015559:exon4:c.A3085G:p.M1029V     | 8.463 |
| SETBP1  | .           | SETBP1:NM_015559:exon4:c.G3199T:p.G1067C     | 14.18 |
| SETBP1  | rs149162154 | SETBP1:NM_015559:exon4:c.A3299G:p.H1100R     | 13.56 |
| SETBP1  | rs3744825   | SETBP1:NM_015559:exon4:c.G3301A:p.V1101I     | 4.173 |
| SETBP1  | rs1064204   | SETBP1:NM_015559:exon4:c.C3388A:p.P1130T     | 5.865 |
| SETBP1  | rs77518617  | SETBP1:NM_015559:exon5:c.G4129C:p.V1377L     | 9.150 |
| SGCZ    | rs145213189 | SGCZ:NM_139167:exon6:c.C587T:p.P196L         | 18.67 |
| SHH     | .           | SHH:NM_000193:exon3:c.G577A:p.A193T          | 19.82 |
| SHH     | .           | SHH:NM_000193:exon1:c.G215T:p.R72L           | 18.17 |
| ST3GAL3 | rs147330005 | ST3GAL3:NM_001270463:exon2:c.G128C:p.S43T    | 13.27 |
| ST3GAL3 | rs37458     | ST3GAL3:NM_174971:exon4:c.A289G:p.T97A       | 2.667 |
| ST3GAL4 | .           | ST3GAL4:NM_001254759:exon1:c.G28A:p.A10T     | 21.1  |
| ST3GAL4 | rs143689441 | ST3GAL4:NM_001254759:exon9:c.G956A:p.R319Q,S | 19.49 |
| SVIL    | .           | SVIL:NM_003174:exon34:c.G5100T:p.E1700D      | 17.06 |
| SVIL    | .           | SVIL:NM_003174:exon33:c.C4945A:p.R1649S      | 14.32 |
| SVIL    | rs17694739  | SVIL:NM_003174:exon32:c.C4844T:p.A1615V      | 16.70 |
| SVIL    | .           | SVIL:NM_003174:exon32:c.G4827T:p.Q1609H      | 18.61 |
| SVIL    | rs7921306   | SVIL:NM_003174:exon32:c.A4735G:p.I1579V      | 13.01 |
| SVIL    | rs61737920  | SVIL:NM_003174:exon27:c.G3976A:p.V1326I      | 4.518 |
| SVIL    | rs143178190 | SVIL:NM_003174:exon27:c.C3860T:p.T1287       | 8.930 |
| SVIL    | rs200315824 | SVIL:NM_003174:exon21:c.G3034A:p.V1012M      | 12.53 |
| SVIL    | rs148355552 | SVIL:NM_003174:exon20:c.G2776A:p.V926I       | 19.54 |
| SVIL    | rs78773460  | SVIL:NM_003174:exon18:c.T2498C:p.M833T       | 17.38 |
| SVIL    | .           | SVIL:NM_003174:exon13:c.G1689T:p.K563N       | 13.51 |
| SVIL    | .           | SVIL:NM_003174:exon11:c.G1011T:p.Q337H       | 19.01 |
| SVIL    | rs148030010 | SVIL:NM_003174:exon9:c.C848T:p.T283M         | 0.592 |
| SVIL    | .           | SVIL:NM_021738:exon8:c.C1630A:p.R544S        | 14.36 |
| SVIL    | rs147010426 | SVIL:NM_021738:exon8:c.G1538A:p.S513N        | 11.12 |
| SVIL    | .           | SVIL:NM_021738:exon6:c.G628C:p.E210Q         | 16.34 |
| SVIL    | rs10160013  | SVIL:NM_021738:exon6:c.T566C:p.V189A         | 5.753 |
| TAOK1   | rs370461672 | TAOK1:NM_020791:exon3:c.G146A:p.R49H,        | 15.99 |
| TAOK1   | .           | TAOK1:NM_025142:exon16:c.G1848T:p.Q616H      | 23.6  |
| TAOK1   | .           | TAOK1:NM_025142:exon18:c.C2315A:p.P772H      | 15.60 |
| THSD4   | rs117286812 | THSD4:NM_001286429:exon1:c.G55A:p.A19T       | 13.26 |
| THSD4   | rs201048829 | THSD4:NM_001286429:exon2:c.G169A:p.V57M      | 19.99 |
| THSD4   | .           | THSD4:NM_001286429:exon3:c.G332T:p.R111L,    | 18.42 |
| THSD4   | rs200113852 | THSD4:NM_001286429:exon6:c.G863C:p.S288T,    | 9.526 |
| THSD4   | rs148016609 | THSD4:NM_001286429:exon10:c.G1628A:p.S543N   | 12.50 |
| TRIM27  | .           | TRIM27:NM_006510:exon8:c.C1279A:p.L427I      | 23.1  |
| TRIM27  | .           | TRIM27:NM_006510:exon8:c.G1058T:p.R353M      | 25.5  |
| UGT1A1  | .           | UGT1A1:NM_000463:exon3:c.G1075T:p.D359Y      | 27.8  |
| UGT1A1  | rs143573365 | UGT1A1:NM_000463:exon4:c.G1156A:p.V386I      | 29.8  |
| UGT1A10 | .           | UGT1A10:NM_019075:exon1:c.C5A:p.A2D          | 15.18 |
| UGT1A10 | .           | UGT1A10:NM_019075:exon1:c.G28A:p.V10I        | 3.391 |
| UGT1A10 | rs201460311 | UGT1A10:NM_019075:exon1:c.G691A:p.A231T      | 14.70 |
| UGT1A10 | rs45574333  | UGT1A10:NM_019075:exon1:c.C764T:p.T255M      | 7.102 |
| VAMP8   | .           | VAMP8:NM_003761:exon3:c.C235A:p.L79I         | 17.87 |
| VAV3    | rs12403266  | VAV3:NM_001079874:exon3:c.G174C:p.Q58H       | 0.031 |
| VAV3    | .           | VAV3:NM_001079874:exon1:c.G3A:p.M1I          | 13.76 |
| VAV3    | rs7528153   | VAV3:NM_006113:exon9:c.A892T:p.T298S         | 8.268 |
| VAV3    | .           | VAV3:NM_006113:exon2:c.C307A:p.R103S         | 16.33 |
| WBSCR17 | rs145445110 | WBSCR17:NM_022479:exon3:c.G526A:p.V176I      | 10.40 |

dbSNP, The Single Nucleotide Polymorphism database; CADD, Combined Annotation Dependent Depletion.

Table SIV. List of all rare nonsynonymous and potentially damaging variants analyzed in the study (irrespective of damaging CADD score).

| Chr          | Start          | Ref      | Alt      | Gene         | dbSNP              | MAF<br>contr | MAF<br>stroke | DNA<br>change   | AACChange      | CADD         |
|--------------|----------------|----------|----------|--------------|--------------------|--------------|---------------|-----------------|----------------|--------------|
| chr5         | 178559254      | A        | G        | ADAMTS2      | rs141650732        | 0.17%        | ND            | c.T2267C        | p.V756A        | 4.300        |
| chr5         | 178564849      | C        | G        | ADAMTS2      | Novel              | 0.13%        | ND            | c.G1872C        | p.E624D        | 17.15        |
| chr5         | 178585789      | T        | C        | ADAMTS2      | Novel              | 0.12%        | ND            | c.A1067G        | p.H356R        | 14.20        |
| chr5         | 178634641      | C        | T        | ADAMTS2      | rs117222015        | 0.12%        | ND            | c.G764A         | p.R255Q        | 9.462        |
| chr5         | 178540897      | G        | A        | ADAMTS2      | rs144078893        | ND           | 0.13%         | c.C3607T        | p.R1203W       | 13.64        |
| chr5         | 178552048      | C        | T        | ADAMTS2      | Novel              | ND           | 0.16%         | c.G2884A        | p.A962T        | 16.16        |
| chr5         | 178552114      | C        | T        | ADAMTS2      | rs367796431        | ND           | 0.11%         | c.G2818A        | p.V940M        | 18.13        |
| chr19        | 40761140       | T        | C        | AKT2         | rs200272953        | 0.13%        | ND            | c.A26G          | p.N9S          | 14.73        |
| chr19        | 40739826       | G        | A        | AKT2         | rs142926499        | ND           | 0.15%         | c.C1213T        | p.R405W        | 28.3         |
| chr19        | 40741903       | G        | A        | AKT2         | Novel              | ND           | 0.13%         | c.C883T         | p.R295C        | 14.17        |
| chr12        | 100169398      | G        | A        | ANKS1B       | Novel              | ND           | 0.12%         | c.C889T         | p.P297S        | 0.295        |
| chr7         | 128502963      | C        | T        | ATP6V1F      | Novel              | 0.11%        | ND            | c.C5T           | p.A2V          | 31           |
| chr7         | 128505573      | G        | A        | ATP6V1F      | rs200874610        | ND           | 0.10%         | c.G301A         | p.A101T        | 12.11        |
| chr7         | 128505592      | G        | T        | ATP6V1F      | Novel              | ND           | 0.23%         | c.G320T         | p.R107L        | 26.2         |
| chr20        | 56093888       | C        | T        | CTCF         | rs146122711        | 0.17%        | ND            | c.G199A         | p.V67I         | 8.611        |
| chr20        | 56082800       | A        | C        | CTCF         | Novel              | ND           | 0.18%         | c.T1291G        | p.S431A        | 1.824        |
| chr20        | 56087796       | C        | T        | CTCF         | rs6092491          | ND           | 0.12%         | c.G557A         | p.R186H        | 11.86        |
| chr10        | 16932454       | C        | T        | CUBN         | rs150488625        | 0.12%        | ND            | c.G8671A        | p.V2891I       | 0.899        |
| chr10        | 16962073       | T        | C        | CUBN         | Novel              | ND           | 0.13%         | c.A6710G        | p.H2237R       | 20.6         |
| chr10        | 17126387       | G        | C        | CUBN         | Novel              | ND           | ND            | c.C2184G        | p.F728L        | 6.704        |
| chr10        | 17142105       | T        | C        | CUBN         | Novel              | 0.12%        | ND            | c.A1664G        | p.H555R        | 0.017        |
| chr10        | 16918927       | G        | C        | CUBN         | Novel              | ND           | 0.27%         | c.C9075G        | p.D3025E       | 13.46        |
| chr10        | 16941000       | C        | T        | CUBN         | rs146847375        | ND           | 0.14%         | c.G8593A        | p.V2865M       | 15.64        |
| chr10        | 16942635       | G        | A        | CUBN         | rs141737312        | ND           | 0.15%         | c.C8399T        | p.T2800I       | 15.52        |
| chr10        | 16948390       | G        | C        | CUBN         | rs3740168          | ND           | 0.19%         | c.C7724G        | p.P2575R       | 7.428        |
| chr10        | 17157571       | C        | A        | CUBN         | Novel              | ND           | 0.13%         | c.G619T         | p.G207X        | 35           |
| chr5         | 15937048       | G        | A        | FBXL7        | Novel              | 0.10%        | ND            | c.G1088A        | p.G363D        | 20.2         |
| chr1         | 161187803      | A        | G        | FCER1G       | Novel              | ND           | 0.11%         | c.A77G          | p.Y26C         | 21.8         |
| chr9         | 4118287        | C        | G        | GLIS3        | rs138497710        | 0.16%        | ND            | c.G726C         | p.Q242H        | 15.66        |
| chr9         | 4118585        | G        | T        | GLIS3        | rs148572278        | 0.14%        | ND            | c.C428A         | p.S143Y        | 22.1         |
| chr22        | 23465451       | G        | A        | GNAZ         | rs545366122        | ND           | 0.15%         | c.G901A         | p.A301T        | 36           |
| chr6         | 154521021      | C        | T        | IPCEF1       | rs146319173        | 0.19%        | ND            | c.G691A         | p.A231T        | 11.35        |
| chr9         | 5126715        | A        | G        | JAK2         | rs142269166        | 0.16%        | ND            | c.A3323G        | p.N1108S       | 9.816        |
| chr9         | 5081828        | G        | C        | JAK2         | rs150221602        | ND           | 0.13%         | c.G2538C        | p.E846D        | 14.82        |
| chr10        | 64974548       | A        | G        | JMJD1C       | rs151186255        | 0.16%        | ND            | c.T833C         | p.M278T        | 0.049        |
| chr10        | 64975109       | C        | T        | JMJD1C       | rs370533547        | ND           | 0.13%         | c.G383A         | p.R128H        | 15.06        |
| chr11        | 2608850        | G        | T        | KCNQ1        | rs12720457         | 0.16%        | ND            | c.G1179T        | p.K393N        | 6.560        |
| chr11        | 2482943        | G        | T        | KCNQ1        | Novel              | ND           | 0.15%         | c.G4T           | p.D2Y          | 5.53         |
| <b>chr11</b> | <b>2593283</b> | <b>G</b> | <b>T</b> | <b>KCNQ1</b> | <b>rs199472712</b> | <b>ND</b>    | <b>0.19%</b>  | <b>c.G724T</b>  | <b>p.D242Y</b> | <b>19.35</b> |
| <b>chr11</b> | <b>2594150</b> | <b>G</b> | <b>T</b> | <b>KCNQ1</b> | <b>Novel</b>       | <b>ND</b>    | <b>0.15%</b>  | <b>c.G855T</b>  | <b>p.K285N</b> | <b>15.48</b> |
| <b>chr11</b> | <b>2790104</b> | <b>G</b> | <b>T</b> | <b>KCNQ1</b> | <b>Novel</b>       | <b>ND</b>    | <b>0.13%</b>  | <b>c.G1545T</b> | <b>p.K515N</b> | <b>13.22</b> |
| <b>chr11</b> | <b>2797196</b> | <b>C</b> | <b>T</b> | <b>KCNQ1</b> | <b>rs199472793</b> | <b>ND</b>    | <b>0.14%</b>  | <b>c.C1597T</b> | <b>p.R533W</b> | <b>15.28</b> |
| <b>chr11</b> | <b>2797236</b> | <b>C</b> | <b>A</b> | <b>KCNQ1</b> | <b>Novel</b>       | <b>ND</b>    | <b>0.17%</b>  | <b>c.C1637A</b> | <b>p.S546X</b> | <b>39</b>    |
| <b>chr11</b> | <b>2869033</b> | <b>G</b> | <b>A</b> | <b>KCNQ1</b> | <b>rs147445322</b> | <b>ND</b>    | <b>0.10%</b>  | <b>c.G1831A</b> | <b>p.D611N</b> | <b>13.42</b> |
| chr6         | 53516869       | C        | A        | KLHL31       | rs61745239         | 0.11%        | ND            | c.G1432T        | p.A478S        | 19.72        |
| chr6         | 53516779       | C        | T        | KLHL31       | rs3799261          | ND           | 0.16%         | c.G1522A        | p.A508T        | 17.41        |
| chr6         | 53519358       | A        | G        | KLHL31       | rs149644917        | ND           | 0.35%         | c.T713C         | p.M238T        | 8.078        |
| chr11        | 18487198       | G        | A        | LDHAL6A      | Novel              | 0.11%        | ND            | c.G259A         | p.A87T         | 18.01        |
| chr11        | 18487234       | C        | T        | LDHAL6A      | rs201761125        | 0.17%        | ND            | c.C295T         | p.R99C         | 15.07        |
| chr11        | 18497106       | G        | A        | LDHAL6A      | rs201642140        | 0.12%        | ND            | c.G512A         | p.R171H        | 16.29        |
| chr11        | 18497175       | G        | A        | LDHAL6A      | Novel              | ND           | 0.20%         | c.G581A         | p.G194D        | 20.3         |
| chr11        | 18497974       | G        | T        | LDHAL6A      | Novel              | ND           | 0.12%         | c.G636T         | p.K212N        | 17.48        |
| chr9         | 113704313      | T        | C        | LPAR1        | rs147151638        | 0.16%        | ND            | c.A181G         | p.I61V         | 1.493        |
| chr9         | 113703965      | C        | T        | LPAR1        | rs372111806        | ND           | 0.15%         | c.G529A         | p.V177I        | 5.776        |
| chr2         | 238632224      | G        | A        | LRRFIP1      | rs188452721        | ND           | 0.13%         | c.G379A         | p.A127T        | 11.11        |
| chr19        | 4095411        | C        | A        | MAP2K2       | rs564067943        | ND           | 0.15%         | c.G1021T        | p.D341Y        | 20.4         |
| chr19        | 4099336        | G        | A        | MAP2K2       | Novel              | ND           | 0.10%         | c.C782T         | p.A261V        | 21.5         |

Table SIV. Continued.

| Chr   | Start     | Ref | Alt | Gene    | dbSNP       | MAF<br>contr | MAF<br>stroke | DNA<br>change | AACChange | CADD  |
|-------|-----------|-----|-----|---------|-------------|--------------|---------------|---------------|-----------|-------|
| chr19 | 4101040   | C   | T   | MAP2K2  | Novel       | ND           | 0.11%         | c.G682A       | p.V228M   | 20.7  |
| chr17 | 12044509  | G   | A   | MAP2K4  | Novel       | 0.12%        | ND            | c.G1132A      | p.A378T   | 33    |
| chr14 | 37737946  | C   | T   | MIPOL1  | Novel       | ND           | 0.13%         | c.C335T       | p.T112I   | 18.19 |
| chr14 | 37838818  | C   | T   | MIPOL1  | Novel       | ND           | 0.21%         | c.C925T       | p.R309C   | 22.6  |
| chr18 | 8784282   | C   | T   | MTCL1   | rs199867297 | 0.11%        | ND            | c.C1172T      | p.A391V   | 2.432 |
| chr18 | 8784717   | T   | C   | MTCL1   | rs143118025 | 0.19%        | ND            | c.T1607C      | p.I536T   | 3.140 |
| chr18 | 8798252   | G   | A   | MTCL1   | rs200421486 | 0.12%        | ND            | c.G2399A      | p.R800Q   | 14.84 |
| chr18 | 8819004   | G   | A   | MTCL1   | Novel       | 0.12%        | ND            | c.G2903A      | p.C968Y   | 14.85 |
| chr18 | 8720427   | G   | T   | MTCL1   | rs541450483 | ND           | 0.13%         | c.G290T       | p.R97L    | 35    |
| chr18 | 8824885   | G   | A   | MTCL1   | Novel       | ND           | 0.18%         | c.G3377A      | p.G1126D  | 0.016 |
| chr18 | 8825025   | C   | T   | MTCL1   | Novel       | ND           | 0.12%         | c.C3517T      | p.H1173Y  | 13.32 |
| chr18 | 8825901   | C   | T   | MTCL1   | rs61753867  | ND           | 0.14%         | c.C4393T      | p.R1465W  | 16.18 |
| chr18 | 47429125  | G   | A   | MYO5B   | Novel       | 0.14%        | ND            | c.C2650T      | p.R884W   | 14.80 |
| chr18 | 47429145  | C   | T   | MYO5B   | Novel       | 0.12%        | ND            | c.G2630A      | p.R877H   | 24.3  |
| chr18 | 47506839  | C   | T   | MYO5B   | rs189027956 | 0.12%        | ND            | c.G1031A      | p.R344H   | 27.0  |
| chr18 | 47361739  | G   | A   | MYO5B   | rs374025628 | ND           | 0.13%         | c.C5369T      | p.T1790I  | 21.5  |
| chr18 | 47373530  | C   | T   | MYO5B   | rs201914259 | ND           | 0.13%         | c.G4445A      | p.R1482Q  | 17.50 |
| chr18 | 47373531  | G   | A   | MYO5B   | rs531744417 | ND           | 0.15%         | c.C4444T      | p.R1482W  | 17.16 |
| chr18 | 47379827  | C   | A   | MYO5B   | Novel       | ND           | 0.14%         | c.G4213T      | p.E1405X  | 37    |
| chr18 | 47421366  | G   | A   | MYO5B   | Novel       | ND           | 0.10%         | c.C2990T      | p.S997L   | 16.26 |
| chr18 | 47432898  | T   | C   | MYO5B   | rs370511121 | ND           | 0.20%         | c.A2305G      | p.I769V   | 13.33 |
| chr3  | 13359272  | G   | A   | NUP210  | rs201198335 | 0.12%        | ND            | c.C5573T      | p.A1858V  | 12.24 |
| chr3  | 13361277  | C   | T   | NUP210  | rs149611952 | 0.18%        | ND            | c.G5369A      | p.R1790H  | 9.432 |
| chr3  | 13384748  | A   | G   | NUP210  | rs2271502   | 0.16%        | ND            | c.T2891C      | p.V964A   | 3.957 |
| chr3  | 13393479  | G   | A   | NUP210  | rs200277108 | 0.11%        | ND            | c.C2735T      | p.A912V   | 0.014 |
| chr3  | 13421182  | T   | C   | NUP210  | Novel       | 0.14%        | ND            | c.A857G       | p.Q286R   | 23.0  |
| chr20 | 56136686  | C   | G   | PCK1    | Novel       | 0.14%        | ND            | c.C219G       | p.D73E    | 11.90 |
| chr20 | 56138744  | G   | A   | PCK1    | rs45603039  | 0.23%        | ND            | c.G922A       | p.V308I   | 21.4  |
| chr7  | 106509078 | G   | T   | PIK3CG  | rs62001903  | ND           | 0.13%         | c.G1072T      | p.D358Y   | 11.23 |
| chr9  | 71437559  | C   | A   | PIP5K1B | rs61752950  | 0.12%        | ND            | c.C29A        | p.A10E    | 16.08 |
| chr20 | 4680245   | G   | A   | PRNP    | Novel       | 0.10%        | ND            | c.G379A       | p.G127S   | 24.1  |
| chr1  | 28477408  | C   | A   | PTAFR   | Novel       | 0.11%        | ND            | c.G125T       | p.R42L    | 14.45 |
| chr1  | 28477192  | T   | C   | PTAFR   | rs138629813 | ND           | 0.21%         | c.A341G       | p.N114S   | 20.8  |
| chr12 | 112940006 | C   | T   | PTPN11  | rs148176616 | 0.13%        | ND            | c.C1658T      | p.T553M   | 16.08 |
| chr9  | 8633320   | G   | A   | PTPRD   | Novel       | 0.15%        | ND            | c.C349T       | p.R117W   | 23.8  |
| chr9  | 8633320   | G   | A   | PTPRD   | Novel       | 0.12%        | ND            | c.C349T       | p.R117W   | 23.8  |
| chr9  | 8471047   | C   | T   | PTPRD   | rs201751722 | ND           | 0.16%         | c.G2189A      | p.R730H   | 27.2  |
| chr11 | 48181494  | G   | T   | PTPRJ   | rs138938184 | ND           | 0.15%         | c.G3451T      | p.E1151X  | 43    |
| chr11 | 48188893  | G   | C   | PTPRJ   | Novel       | ND           | 0.18%         | c.G3993C      | p.K1331N  | 13.46 |
| chr3  | 12641707  | C   | T   | RAF1    | rs555034652 | ND           | 0.14%         | c.G934A       | p.V312M   | 12.39 |
| chr1  | 192150512 | G   | T   | RGS18   | rs112220830 | ND           | 0.20%         | c.G374T       | p.S125I   | 0.354 |
| chr18 | 42532390  | A   | G   | SETBP1  | Novel       | 0.12%        | ND            | c.A3085G      | p.M1029V  | 8.463 |
| chr18 | 42532604  | A   | G   | SETBP1  | rs149162154 | ND           | 0.15%         | c.A3299G      | p.H1100R  | 13.56 |
| chr8  | 13965705  | G   | A   | SGCZ    | rs145213189 | 0.12%        | ND            | c.C587T       | p.P196L   | 18.67 |
| chr7  | 155596406 | C   | T   | SHH     | Novel       | ND           | 0.13%         | c.G577A       | p.A193T   | 19.82 |
| chr7  | 155604602 | C   | A   | SHH     | Novel       | ND           | 0.16%         | c.G215T       | p.R72L    | 18.17 |
| chr1  | 44202061  | G   | C   | ST3GAL3 | rs147330005 | ND           | 0.16%         | c.G128C       | p.S43T    | 13.27 |
| chr11 | 126276382 | G   | A   | ST3GAL4 | Novel       | 0.12%        | ND            | c.G28A        | p.A10T    | 21.1  |
| chr11 | 126283899 | G   | A   | ST3GAL4 | rs143689441 | 0.10%        | ND            | c.G956A       | p.R319Q   | 19.49 |
| chr10 | 29839725  | C   | G   | SVIL    | Novel       | 0.15%        | ND            | c.G628C       | p.E210Q   | 16.34 |
| chr10 | 29752463  | C   | T   | SVIL    | rs146403956 | ND           | 0.21%         | c.G4957A      | p.D1653N  | 21.5  |
| chr10 | 29769705  | G   | A   | SVIL    | rs143178190 | ND           | 0.31%         | c.C3860T      | p.T1287I  | 8.930 |
| chr10 | 29770516  | G   | C   | SVIL    | Novel       | ND           | 0.11%         | c.C3819G      | p.H1273Q  | 0.018 |
| chr10 | 29818694  | C   | T   | SVIL    | Novel       | ND           | 0.12%         | c.G1004A      | p.R335H   | 28.3  |
| chr10 | 29821758  | C   | T   | SVIL    | rs147010426 | ND           | 0.15%         | c.G1538A      | p.S513N   | 11.12 |
| chr17 | 27794176  | G   | A   | TAOK1   | rs370461672 | ND           | 0.11%         | c.G146A       | p.R49H    | 15.99 |
| chr15 | 71839803  | G   | A   | THSD4   | rs117286812 | 0.14%        | ND            | c.G55A        | p.A19T    | 13.26 |
| chr15 | 71952965  | G   | A   | THSD4   | rs201048829 | 0.20%        | ND            | c.G169A       | p.V57M    | 19.99 |

Table SIV. Continued.

| Chr   | Start     | Ref | Alt | Gene   | dbSNP       | MAF<br>contr | MAF<br>stroke | DNA<br>change | AAChange | CADD  |
|-------|-----------|-----|-----|--------|-------------|--------------|---------------|---------------|----------|-------|
| chr15 | 72037481  | G   | C   | THSD4  | rs200113852 | 0.14%        | ND            | c.G863C       | p.S288T  | 9.526 |
| chr2  | 234676937 | G   | A   | UGT1A1 | rs143573365 | ND           | 0.11%         | c.G1156A      | p.V386I  | 29.8  |
| chr2  | 234545196 | G   | A   | UGT1A1 | Novel       | 0.13%        | ND            | c.G28A        | p.V10I   | 3.391 |
| chr2  | 234545173 | C   | A   | UGT1A1 | Novel       | ND           | 0.12%         | c.C5A         | p.A2D    | 15.18 |
| chr1  | 108231051 | C   | T   | VAV3   | Novel       | 0.10%        | ND            | c.G3A         | p.M1I    | 13.76 |

Variants that appear in bold italics were selected for individual genotyping. Chr, chromosome; Ref, reference; Alt, alternative; dbSNP; The Single Nucleotide Polymorphism database; MAF, minor allele frequency; MAF contr, minor allele frequency in controls; AAChange, Amino acid change; CADD, Combined Annotation Dependent Depletion; ND, no difference.
